# Supplementary material
Source: Research Square preprint supplement (doi:10.21203/rs.3.rs-9174810/v1)
Supplement: Supplementary file 1 [file 0f9c2767d2c34b6ddbc16c96.xlsx]

## Sheet: Sheet1
Subject	ROI	Group	Feature	Observer 1	Observer 2
P01	AC-M	Normal	ASM	0.00193738	0.00156007
P01	AC-M	VRF	ASM	0.00186537	0.00153932
P01	AC-M	Normal	Contrast	1063.43	685.413
P01	AC-M	VRF	Contrast	420.139	444.5
P01	AC-M	Normal	Entropy	11.177	11.4248
P01	AC-M	VRF	Entropy	11.2317	11.4394
P01	AC-M	Normal	FD	1.03848	0.998293
P01	AC-M	VRF	FD	1.02184	0.952923
P01	AC-M	Normal	IDM	0.101764	0.121129
P01	AC-M	VRF	IDM	0.14328	0.12411
P01	AC-M	Normal	Lacunarity	1.29757	1.32776
P01	AC-M	VRF	Lacunarity	1.32435	1.3092
P01	AC-D	Normal	ASM	0.00105533	0.000883984
P01	AC-D	VRF	ASM	0.00109137	0.00090078
P01	AC-D	Normal	Contrast	722.569	466.254
P01	AC-D	VRF	Contrast	497.909	447.083
P01	AC-D	Normal	Entropy	12.082	12.2899
P01	AC-D	VRF	Entropy	12.0511	12.2738
P01	AC-D	Normal	FD	1.11422	1.02236
P01	AC-D	VRF	FD	1.07365	1.03835
P01	AC-D	Normal	IDM	0.117226	0.147003
P01	AC-D	VRF	IDM	0.138189	0.136537
P01	AC-D	Normal	Lacunarity	1.17933	1.18
P01	AC-D	VRF	Lacunarity	1.19194	1.18231
P01	APEX	Normal	ASM	0.000446235	0.000415297
P01	APEX	VRF	ASM	0.00054931	0.000483977
P01	APEX	Normal	Contrast	375.311	354.388
P01	APEX	VRF	Contrast	449.26	398.944
P01	APEX	Normal	Entropy	13.4028	13.4942
P01	APEX	VRF	Entropy	13.1206	13.301
P01	APEX	Normal	FD	1.1345	1.08721
P01	APEX	VRF	FD	1.1095	1.09969
P01	APEX	Normal	IDM	0.149869	0.159988
P01	APEX	VRF	IDM	0.144081	0.148659
P01	APEX	Normal	Lacunarity	1.16153	1.1631
P01	APEX	VRF	Lacunarity	1.15952	1.16083
P01	MID-M	Normal	ASM	0.000807585	0.000707253
P01	MID-M	VRF	ASM	0.000821007	0.000721967
P01	MID-M	Normal	Contrast	608.189	458.044
P01	MID-M	VRF	Contrast	459.008	410.886
P01	MID-M	Normal	Entropy	12.4982	12.6559
P01	MID-M	VRF	Entropy	12.4896	12.6452
P01	MID-M	Normal	FD	1.16561	1.11785
P01	MID-M	VRF	FD	1.13264	1.12387
P01	MID-M	Normal	IDM	0.124199	0.151635
P01	MID-M	VRF	IDM	0.139954	0.142834
P01	MID-M	Normal	Lacunarity	1.12296	1.13674
P01	MID-M	VRF	Lacunarity	1.14982	1.14219
P01	MID-D	Normal	ASM	0.000649907	0.000601804
P01	MID-D	VRF	ASM	0.000733914	0.000632773
P01	MID-D	Normal	Contrast	569.648	423.811
P01	MID-D	VRF	Contrast	469.213	401.637
P01	MID-D	Normal	Entropy	12.8288	12.914
P01	MID-D	VRF	Entropy	12.6904	12.8757
P01	MID-D	Normal	FD	1.09628	1.08936
P01	MID-D	VRF	FD	1.08269	1.08528
P01	MID-D	Normal	IDM	0.128892	0.149557
P01	MID-D	VRF	IDM	0.140568	0.144061
P01	MID-D	Normal	Lacunarity	1.16592	1.1626
P01	MID-D	VRF	Lacunarity	1.17618	1.17569
P01	PERI-M	Normal	ASM	0.000505531	0.000466665
P01	PERI-M	VRF	ASM	0.000635863	0.000543877
P01	PERI-M	Normal	Contrast	359.83	377.665
P01	PERI-M	VRF	Contrast	468.664	428.882
P01	PERI-M	Normal	Entropy	13.1875	13.2792
P01	PERI-M	VRF	Entropy	12.8914	13.1026
P01	PERI-M	Normal	FD	1.13313	1.1014
P01	PERI-M	VRF	FD	1.11651	1.10172
P01	PERI-M	Normal	IDM	0.15119	0.158271
P01	PERI-M	VRF	IDM	0.142107	0.146117
P01	PERI-M	Normal	Lacunarity	1.17868	1.18168
P01	PERI-M	VRF	Lacunarity	1.17031	1.17472
P01	PERI-D	Normal	ASM	0.000471227	0.00043051
P01	PERI-D	VRF	ASM	0.000589567	0.000508383
P01	PERI-D	Normal	Contrast	383.591	372.472
P01	PERI-D	VRF	Contrast	468.421	418.128
P01	PERI-D	Normal	Entropy	13.3077	13.4203
P01	PERI-D	VRF	Entropy	13.0105	13.219
P01	PERI-D	Normal	FD	1.16214	1.10351
P01	PERI-D	VRF	FD	1.13347	1.11717
P01	PERI-D	Normal	IDM	0.151649	0.157962
P01	PERI-D	VRF	IDM	0.142226	0.146044
P01	PERI-D	Normal	Lacunarity	1.13809	1.13646
P01	PERI-D	VRF	Lacunarity	1.13615	1.14145
P02	AC-M	Normal	ASM	0.00163681	0.00152042
P02	AC-M	VRF	ASM	0.0016325	0.00157414
P02	AC-M	Normal	Contrast	839.186	792.948
P02	AC-M	VRF	Contrast	609.872	590.165
P02	AC-M	Normal	Entropy	11.3697	11.4564
P02	AC-M	VRF	Entropy	11.3692	11.4094
P02	AC-M	Normal	FD	0.976812	0.851847
P02	AC-M	VRF	FD	1.03589	1.08181
P02	AC-M	Normal	IDM	0.109411	0.108534
P02	AC-M	VRF	IDM	0.122215	0.119361
P02	AC-M	Normal	Lacunarity	1.29499	1.30635
P02	AC-M	VRF	Lacunarity	1.30322	1.30201
P02	AC-D	Normal	ASM	0.00081032	0.000770425
P02	AC-D	VRF	ASM	0.000916215	0.000862214
P02	AC-D	Normal	Contrast	657.493	454.115
P02	AC-D	VRF	Contrast	647.584	683.784
P02	AC-D	Normal	Entropy	12.387	12.449
P02	AC-D	VRF	Entropy	12.2462	12.3139
P02	AC-D	Normal	FD	1.03882	0.935641
P02	AC-D	VRF	FD	1.10255	1.0917
P02	AC-D	Normal	IDM	0.136353	0.140703
P02	AC-D	VRF	IDM	0.121216	0.119641
P02	AC-D	Normal	Lacunarity	1.17595	1.17514
P02	AC-D	VRF	Lacunarity	1.17896	1.17875
P02	APEX	Normal	ASM	0.000385535	0.000419176
P02	APEX	VRF	ASM	0.000368887	0.000381088
P02	APEX	Normal	Contrast	428.481	292.243
P02	APEX	VRF	Contrast	384.282	453.228
P02	APEX	Normal	Entropy	13.5903	13.5091
P02	APEX	VRF	Entropy	13.6409	13.5962
P02	APEX	Normal	FD	1.08859	1.08117
P02	APEX	VRF	FD	1.09516	1.12011
P02	APEX	Normal	IDM	0.156271	0.168559
P02	APEX	VRF	IDM	0.16108	0.153346
P02	APEX	Normal	Lacunarity	1.14589	1.14805
P02	APEX	VRF	Lacunarity	1.14953	1.1508
P02	MID-M	Normal	ASM	0.0006423	0.000582904
P02	MID-M	VRF	ASM	0.000644946	0.000599033
P02	MID-M	Normal	Contrast	599.07	441.728
P02	MID-M	VRF	Contrast	485.871	468.845
P02	MID-M	Normal	Entropy	12.7815	12.8915
P02	MID-M	VRF	Entropy	12.7688	12.8541
P02	MID-M	Normal	FD	1.07282	0.972648
P02	MID-M	VRF	FD	1.1652	1.15133
P02	MID-M	Normal	IDM	0.145295	0.146294
P02	MID-M	VRF	IDM	0.136356	0.143781
P02	MID-M	Normal	Lacunarity	1.13014	1.13147
P02	MID-M	VRF	Lacunarity	1.13961	1.13754
P02	MID-D	Normal	ASM	0.000525782	0.000506233
P02	MID-D	VRF	ASM	0.000557957	0.000514784
P02	MID-D	Normal	Contrast	587.119	401.768
P02	MID-D	VRF	Contrast	482.96	493.752
P02	MID-D	Normal	Entropy	13.0902	13.1392
P02	MID-D	VRF	Entropy	13.0151	13.1167
P02	MID-D	Normal	FD	1.04117	0.972354
P02	MID-D	VRF	FD	1.08681	1.13725
P02	MID-D	Normal	IDM	0.141512	0.153447
P02	MID-D	VRF	IDM	0.138467	0.147136
P02	MID-D	Normal	Lacunarity	1.16089	1.16222
P02	MID-D	VRF	Lacunarity	1.1707	1.16673
P02	PERI-M	Normal	ASM	0.000478831	0.000469196
P02	PERI-M	VRF	ASM	0.000456494	0.000438557
P02	PERI-M	Normal	Contrast	544.142	361.846
P02	PERI-M	VRF	Contrast	436.663	490.345
P02	PERI-M	Normal	Entropy	13.2529	13.2869
P02	PERI-M	VRF	Entropy	13.3075	13.3554
P02	PERI-M	Normal	FD	1.06873	1.0433
P02	PERI-M	VRF	FD	1.11452	1.11435
P02	PERI-M	Normal	IDM	0.144798	0.158378
P02	PERI-M	VRF	IDM	0.147733	0.150683
P02	PERI-M	Normal	Lacunarity	1.15159	1.15457
P02	PERI-M	VRF	Lacunarity	1.15977	1.15988
P02	PERI-D	Normal	ASM	0.00045364	0.000446087
P02	PERI-D	VRF	ASM	0.000404562	0.000407011
P02	PERI-D	Normal	Contrast	533.239	342.263
P02	PERI-D	VRF	Contrast	371.666	478.13
P02	PERI-D	Normal	Entropy	13.3605	13.3937
P02	PERI-D	VRF	Entropy	13.4993	13.4876
P02	PERI-D	Normal	FD	1.10187	1.07836
P02	PERI-D	VRF	FD	1.11359	1.12791
P02	PERI-D	Normal	IDM	0.145926	0.16012
P02	PERI-D	VRF	IDM	0.159214	0.151821
P02	PERI-D	Normal	Lacunarity	1.12098	1.1241
P02	PERI-D	VRF	Lacunarity	1.12615	1.12494
P03	AC-M	Normal	ASM	0.00184045	0.00186158
P03	AC-M	VRF	ASM	0.00157685	0.0015275
P03	AC-M	Normal	Contrast	829.103	948.962
P03	AC-M	VRF	Contrast	880.998	596.206
P03	AC-M	Normal	Entropy	11.2388	11.2076
P03	AC-M	VRF	Entropy	11.4092	11.4467
P03	AC-M	Normal	FD	1.08399	0.961486
P03	AC-M	VRF	FD	0.919764	0.919612
P03	AC-M	Normal	IDM	0.106997	0.106881
P03	AC-M	VRF	IDM	0.1131	0.12546
P03	AC-M	Normal	Lacunarity	1.30566	1.30602
P03	AC-M	VRF	Lacunarity	1.28673	1.27592
P03	AC-D	Normal	ASM	0.00100723	0.00108554
P03	AC-D	VRF	ASM	0.00077794	0.000781537
P03	AC-D	Normal	Contrast	629.527	621.341
P03	AC-D	VRF	Contrast	558.218	715.227
P03	AC-D	Normal	Entropy	12.1415	12.0471
P03	AC-D	VRF	Entropy	12.4346	12.4251
P03	AC-D	Normal	FD	1.08448	1.07917
P03	AC-D	VRF	FD	1.00152	0.99301
P03	AC-D	Normal	IDM	0.143352	0.138313
P03	AC-D	VRF	IDM	0.143114	0.130591
P03	AC-D	Normal	Lacunarity	1.16937	1.16802
P03	AC-D	VRF	Lacunarity	1.18456	1.17248
P03	APEX	Normal	ASM	0.000476882	0.000496681
P03	APEX	VRF	ASM	0.000379513	0.000380446
P03	APEX	Normal	Contrast	504.45	417.55
P03	APEX	VRF	Contrast	257.3	302.016
P03	APEX	Normal	Entropy	13.3082	13.2612
P03	APEX	VRF	Entropy	13.6312	13.6304
P03	APEX	Normal	FD	1.09402	1.09547
P03	APEX	VRF	FD	1.07045	1.08343
P03	APEX	Normal	IDM	0.152092	0.157233
P03	APEX	VRF	IDM	0.174502	0.170446
P03	APEX	Normal	Lacunarity	1.15089	1.15051
P03	APEX	VRF	Lacunarity	1.15208	1.1532
P03	MID-M	Normal	ASM	0.00074448	0.000847693
P03	MID-M	VRF	ASM	0.000574402	0.000587287
P03	MID-M	Normal	Contrast	638.854	609.99
P03	MID-M	VRF	Contrast	334.015	372.59
P03	MID-M	Normal	Entropy	12.595	12.4321
P03	MID-M	VRF	Entropy	12.9119	12.8836
P03	MID-M	Normal	FD	1.10969	1.12166
P03	MID-M	VRF	FD	1.0367	1.07613
P03	MID-M	Normal	IDM	0.142901	0.134971
P03	MID-M	VRF	IDM	0.161985	0.156298
P03	MID-M	Normal	Lacunarity	1.12764	1.12318
P03	MID-M	VRF	Lacunarity	1.1283	1.12205
P03	MID-D	Normal	ASM	0.000651363	0.000685391
P03	MID-D	VRF	ASM	0.000470183	0.00046401
P03	MID-D	Normal	Contrast	640.933	554.052
P03	MID-D	VRF	Contrast	278.916	342.466
P03	MID-D	Normal	Entropy	12.8327	12.7526
P03	MID-D	VRF	Entropy	13.2259	13.2389
P03	MID-D	Normal	FD	1.06612	1.09155
P03	MID-D	VRF	FD	1.03765	1.02571
P03	MID-D	Normal	IDM	0.147725	0.147794
P03	MID-D	VRF	IDM	0.168478	0.159619
P03	MID-D	Normal	Lacunarity	1.15858	1.15555
P03	MID-D	VRF	Lacunarity	1.16768	1.16424
P03	PERI-M	Normal	ASM	0.00058053	0.000629932
P03	PERI-M	VRF	ASM	0.000430735	0.000427349
P03	PERI-M	Normal	Contrast	608.934	552.202
P03	PERI-M	VRF	Contrast	269.163	324.142
P03	PERI-M	Normal	Entropy	13.009	12.8935
P03	PERI-M	VRF	Entropy	13.3959	13.4028
P03	PERI-M	Normal	FD	1.09292	1.10916
P03	PERI-M	VRF	FD	1.06688	1.07808
P03	PERI-M	Normal	IDM	0.148039	0.146815
P03	PERI-M	VRF	IDM	0.174121	0.166299
P03	PERI-M	Normal	Lacunarity	1.15158	1.14925
P03	PERI-M	VRF	Lacunarity	1.15505	1.15409
P03	PERI-D	Normal	ASM	0.000545831	0.000593735
P03	PERI-D	VRF	ASM	0.000396675	0.000388961
P03	PERI-D	Normal	Contrast	576.859	548.452
P03	PERI-D	VRF	Contrast	259.914	315.061
P03	PERI-D	Normal	Entropy	13.1155	12.999
P03	PERI-D	VRF	Entropy	13.5368	13.5577
P03	PERI-D	Normal	FD	1.10568	1.10297
P03	PERI-D	VRF	FD	1.06442	1.08396
P03	PERI-D	Normal	IDM	0.14813	0.145755
P03	PERI-D	VRF	IDM	0.172373	0.167378
P03	PERI-D	Normal	Lacunarity	1.12157	1.11943
P03	PERI-D	VRF	Lacunarity	1.12561	1.12729
P04	AC-M	Normal	ASM	0.0014213	0.00149298
P04	AC-M	VRF	ASM	0.00151526	0.00146822
P04	AC-M	Normal	Contrast	719.156	454.831
P04	AC-M	VRF	Contrast	397.473	320.771
P04	AC-M	Normal	Entropy	11.5214	11.4768
P04	AC-M	VRF	Entropy	11.4487	11.4948
P04	AC-M	Normal	FD	0.95848	0.756047
P04	AC-M	VRF	FD	0.984915	0.900876
P04	AC-M	Normal	IDM	0.107845	0.147013
P04	AC-M	VRF	IDM	0.145918	0.161082
P04	AC-M	Normal	Lacunarity	1.30013	1.27288
P04	AC-M	VRF	Lacunarity	1.27258	1.24146
P04	AC-D	Normal	ASM	0.000789555	0.000887431
P04	AC-D	VRF	ASM	0.000993354	0.000908498
P04	AC-D	Normal	Contrast	722.454	338.571
P04	AC-D	VRF	Contrast	799.881	633.771
P04	AC-D	Normal	Entropy	12.4167	12.2956
P04	AC-D	VRF	Entropy	12.1882	12.2811
P04	AC-D	Normal	FD	1.04817	0.949271
P04	AC-D	VRF	FD	1.05594	0.982038
P04	AC-D	Normal	IDM	0.112464	0.158448
P04	AC-D	VRF	IDM	0.200853	0.190981
P04	AC-D	Normal	Lacunarity	1.17455	1.18333
P04	AC-D	VRF	Lacunarity	1.25219	1.18788
P04	APEX	Normal	ASM	0.000377484	0.000424872
P04	APEX	VRF	ASM	0.000411086	0.000410049
P04	APEX	Normal	Contrast	509.222	288.083
P04	APEX	VRF	Contrast	376.147	197.318
P04	APEX	Normal	Entropy	13.6562	13.513
P04	APEX	VRF	Entropy	13.5668	13.5472
P04	APEX	Normal	FD	1.05484	1.02877
P04	APEX	VRF	FD	1.07761	1.06321
P04	APEX	Normal	IDM	0.139954	0.167149
P04	APEX	VRF	IDM	0.200773	0.225411
P04	APEX	Normal	Lacunarity	1.15069	1.15744
P04	APEX	VRF	Lacunarity	1.17169	1.17361
P04	MID-M	Normal	ASM	0.000558088	0.000682794
P04	MID-M	VRF	ASM	0.000664511	0.000638043
P04	MID-M	Normal	Contrast	647.515	296.717
P04	MID-M	VRF	Contrast	661.763	475.544
P04	MID-M	Normal	Entropy	12.9346	12.7299
P04	MID-M	VRF	Entropy	12.7692	12.8044
P04	MID-M	Normal	FD	1.05389	1.06421
P04	MID-M	VRF	FD	1.07672	1.0651
P04	MID-M	Normal	IDM	0.118373	0.163401
P04	MID-M	VRF	IDM	0.193626	0.191963
P04	MID-M	Normal	Lacunarity	1.13096	1.13116
P04	MID-M	VRF	Lacunarity	1.15009	1.12181
P04	MID-D	Normal	ASM	0.000459439	0.000538445
P04	MID-D	VRF	ASM	0.000515605	0.000494175
P04	MID-D	Normal	Contrast	675.86	300.535
P04	MID-D	VRF	Contrast	561.349	416.063
P04	MID-D	Normal	Entropy	13.2456	13.0775
P04	MID-D	VRF	Entropy	13.1313	13.1748
P04	MID-D	Normal	FD	1.02263	1.0053
P04	MID-D	VRF	FD	1.03606	1.0655
P04	MID-D	Normal	IDM	0.119671	0.16004
P04	MID-D	VRF	IDM	0.196463	0.190162
P04	MID-D	Normal	Lacunarity	1.16417	1.16728
P04	MID-D	VRF	Lacunarity	1.18864	1.16805
P04	PERI-M	Normal	ASM	0.000404088	0.00049468
P04	PERI-M	VRF	ASM	0.000437144	0.000421421
P04	PERI-M	Normal	Contrast	509.937	308.087
P04	PERI-M	VRF	Contrast	507.141	360.121
P04	PERI-M	Normal	Entropy	13.4716	13.2446
P04	PERI-M	VRF	Entropy	13.386	13.4203
P04	PERI-M	Normal	FD	1.04882	1.04366
P04	PERI-M	VRF	FD	1.05176	1.05505
P04	PERI-M	Normal	IDM	0.133422	0.164537
P04	PERI-M	VRF	IDM	0.190876	0.190198
P04	PERI-M	Normal	Lacunarity	1.16151	1.16005
P04	PERI-M	VRF	Lacunarity	1.16984	1.16124
P04	PERI-D	Normal	ASM	0.000390957	0.000444812
P04	PERI-D	VRF	ASM	0.000420789	0.000431614
P04	PERI-D	Normal	Contrast	541.245	304.885
P04	PERI-D	VRF	Contrast	416.763	210.37
P04	PERI-D	Normal	Entropy	13.5726	13.4159
P04	PERI-D	VRF	Entropy	13.4932	13.4422
P04	PERI-D	Normal	FD	1.05437	1.04471
P04	PERI-D	VRF	FD	1.09798	1.07875
P04	PERI-D	Normal	IDM	0.138728	0.163246
P04	PERI-D	VRF	IDM	0.199943	0.226053
P04	PERI-D	Normal	Lacunarity	1.12595	1.12902
P04	PERI-D	VRF	Lacunarity	1.14626	1.14683
P05	AC-M	Normal	ASM	0.00195836	0.00200215
P05	AC-M	VRF	ASM	0.00178114	0.00177251
P05	AC-M	Normal	Contrast	634.13	626.955
P05	AC-M	VRF	Contrast	637.683	689.985
P05	AC-M	Normal	Entropy	11.165	11.1449
P05	AC-M	VRF	Entropy	11.2784	11.2869
P05	AC-M	Normal	FD	1.10513	1.13598
P05	AC-M	VRF	FD	0.947851	0.953016
P05	AC-M	Normal	IDM	0.123111	0.126596
P05	AC-M	VRF	IDM	0.123279	0.120305
P05	AC-M	Normal	Lacunarity	1.29787	1.29164
P05	AC-M	VRF	Lacunarity	1.30995	1.30139
P05	AC-D	Normal	ASM	0.00113757	0.00111638
P05	AC-D	VRF	ASM	0.000931861	0.000935838
P05	AC-D	Normal	Contrast	606.46	659.566
P05	AC-D	VRF	Contrast	359.673	355.085
P05	AC-D	Normal	Entropy	11.9863	11.9999
P05	AC-D	VRF	Entropy	12.2345	12.2294
P05	AC-D	Normal	FD	1.10549	1.14886
P05	AC-D	VRF	FD	1.1074	1.13546
P05	AC-D	Normal	IDM	0.128144	0.135665
P05	AC-D	VRF	IDM	0.158351	0.155075
P05	AC-D	Normal	Lacunarity	1.1733	1.18172
P05	AC-D	VRF	Lacunarity	1.17668	1.16833
P05	APEX	Normal	ASM	0.000410939	0.000425449
P05	APEX	VRF	ASM	0.000582973	0.000539062
P05	APEX	Normal	Contrast	300.219	258.473
P05	APEX	VRF	Contrast	270.604	239.78
P05	APEX	Normal	Entropy	13.4996	13.4509
P05	APEX	VRF	Entropy	13.0825	13.1777
P05	APEX	Normal	FD	1.11693	1.12315
P05	APEX	VRF	FD	1.09576	1.14734
P05	APEX	Normal	IDM	0.164059	0.167391
P05	APEX	VRF	IDM	0.169905	0.179635
P05	APEX	Normal	Lacunarity	1.16085	1.16077
P05	APEX	VRF	Lacunarity	1.14765	1.14824
P05	MID-M	Normal	ASM	0.000745587	0.00074761
P05	MID-M	VRF	ASM	0.000750882	0.000727478
P05	MID-M	Normal	Contrast	521.586	515.54
P05	MID-M	VRF	Contrast	350.29	461.845
P05	MID-M	Normal	Entropy	12.5987	12.5871
P05	MID-M	VRF	Entropy	12.5946	12.6316
P05	MID-M	Normal	FD	1.14758	1.1277
P05	MID-M	VRF	FD	1.12071	1.17155
P05	MID-M	Normal	IDM	0.13663	0.142603
P05	MID-M	VRF	IDM	0.159857	0.156862
P05	MID-M	Normal	Lacunarity	1.12842	1.13445
P05	MID-M	VRF	Lacunarity	1.13502	1.13133
P05	MID-D	Normal	ASM	0.000653158	0.000627591
P05	MID-D	VRF	ASM	0.000646568	0.000634125
P05	MID-D	Normal	Contrast	509.715	488.95
P05	MID-D	VRF	Contrast	321.177	343.294
P05	MID-D	Normal	Entropy	12.8266	12.8646
P05	MID-D	VRF	Entropy	12.8421	12.8704
P05	MID-D	Normal	FD	1.12427	1.09376
P05	MID-D	VRF	FD	1.08922	1.13002
P05	MID-D	Normal	IDM	0.138191	0.141936
P05	MID-D	VRF	IDM	0.161666	0.164799
P05	MID-D	Normal	Lacunarity	1.16179	1.1687
P05	MID-D	VRF	Lacunarity	1.16689	1.1663
P05	PERI-M	Normal	ASM	0.0005227	0.000513394
P05	PERI-M	VRF	ASM	0.000636865	0.000591956
P05	PERI-M	Normal	Contrast	444.293	418.998
P05	PERI-M	VRF	Contrast	295.403	315.957
P05	PERI-M	Normal	Entropy	13.1409	13.1545
P05	PERI-M	VRF	Entropy	12.9173	12.9946
P05	PERI-M	Normal	FD	1.11859	1.12649
P05	PERI-M	VRF	FD	1.11895	1.16014
P05	PERI-M	Normal	IDM	0.144688	0.147075
P05	PERI-M	VRF	IDM	0.166098	0.168276
P05	PERI-M	Normal	Lacunarity	1.15817	1.16339
P05	PERI-M	VRF	Lacunarity	1.15351	1.15245
P05	PERI-D	Normal	ASM	0.000473707	0.000471815
P05	PERI-D	VRF	ASM	0.000600491	0.000559446
P05	PERI-D	Normal	Contrast	450.463	398.634
P05	PERI-D	VRF	Contrast	277.838	247.049
P05	PERI-D	Normal	Entropy	13.2893	13.288
P05	PERI-D	VRF	Entropy	13.0231	13.108
P05	PERI-D	Normal	FD	1.13698	1.15041
P05	PERI-D	VRF	FD	1.13774	1.1817
P05	PERI-D	Normal	IDM	0.145949	0.14887
P05	PERI-D	VRF	IDM	0.169587	0.179925
P05	PERI-D	Normal	Lacunarity	1.12777	1.1307
P05	PERI-D	VRF	Lacunarity	1.12346	1.12461
P06	AC-M	Normal	ASM	0.00209135	0.00206402
P06	AC-M	VRF	ASM	0.00192013	0.00176557
P06	AC-M	Normal	Contrast	716.805	1006.14
P06	AC-M	VRF	Contrast	629.129	597.215
P06	AC-M	Normal	Entropy	11.0791	11.0985
P06	AC-M	VRF	Entropy	11.1892	11.2763
P06	AC-M	Normal	FD	1.01529	0.993948
P06	AC-M	VRF	FD	1.00882	0.977217
P06	AC-M	Normal	IDM	0.123586	0.112595
P06	AC-M	VRF	IDM	0.129533	0.130667
P06	AC-M	Normal	Lacunarity	1.28425	1.28825
P06	AC-M	VRF	Lacunarity	1.32017	1.32903
P06	AC-D	Normal	ASM	0.0011145	0.00112607
P06	AC-D	VRF	ASM	0.00113546	0.00110096
P06	AC-D	Normal	Contrast	539.249	578.262
P06	AC-D	VRF	Contrast	447.983	459.052
P06	AC-D	Normal	Entropy	12.0103	11.9997
P06	AC-D	VRF	Entropy	12.011	12.0502
P06	AC-D	Normal	FD	1.11147	1.1369
P06	AC-D	VRF	FD	1.0892	0.988982
P06	AC-D	Normal	IDM	0.141014	0.136393
P06	AC-D	VRF	IDM	0.171247	0.170676
P06	AC-D	Normal	Lacunarity	1.17595	1.18533
P06	AC-D	VRF	Lacunarity	1.1782	1.17859
P06	APEX	Normal	ASM	0.000577187	0.000584485
P06	APEX	VRF	ASM	0.000574754	0.000539332
P06	APEX	Normal	Contrast	461.379	536.585
P06	APEX	VRF	Contrast	420.644	412.659
P06	APEX	Normal	Entropy	13.0477	13.0251
P06	APEX	VRF	Entropy	13.0772	13.1731
P06	APEX	Normal	FD	1.13131	1.13738
P06	APEX	VRF	FD	1.09558	1.01705
P06	APEX	Normal	IDM	0.145018	0.139288
P06	APEX	VRF	IDM	0.188103	0.19619
P06	APEX	Normal	Lacunarity	1.14488	1.15048
P06	APEX	VRF	Lacunarity	1.15767	1.15901
P06	MID-M	Normal	ASM	0.000922773	0.000943464
P06	MID-M	VRF	ASM	0.000857126	0.000811735
P06	MID-M	Normal	Contrast	521.459	626.804
P06	MID-M	VRF	Contrast	502.679	479.477
P06	MID-M	Normal	Entropy	12.3208	12.2886
P06	MID-M	VRF	Entropy	12.4355	12.4973
P06	MID-M	Normal	FD	1.16518	1.18104
P06	MID-M	VRF	FD	1.11873	1.08482
P06	MID-M	Normal	IDM	0.140153	0.133852
P06	MID-M	VRF	IDM	0.168956	0.167167
P06	MID-M	Normal	Lacunarity	1.11795	1.12855
P06	MID-M	VRF	Lacunarity	1.13971	1.14325
P06	MID-D	Normal	ASM	0.000763337	0.000778618
P06	MID-D	VRF	ASM	0.000721646	0.000676125
P06	MID-D	Normal	Contrast	489.484	622.769
P06	MID-D	VRF	Contrast	481.248	513.475
P06	MID-D	Normal	Entropy	12.6144	12.5812
P06	MID-D	VRF	Entropy	12.7159	12.8063
P06	MID-D	Normal	FD	1.11633	1.07705
P06	MID-D	VRF	FD	1.0796	1.04819
P06	MID-D	Normal	IDM	0.14376	0.134582
P06	MID-D	VRF	IDM	0.183991	0.19138
P06	MID-D	Normal	Lacunarity	1.15368	1.16227
P06	MID-D	VRF	Lacunarity	1.17041	1.17371
P06	PERI-M	Normal	ASM	0.000665495	0.000676293
P06	PERI-M	VRF	ASM	0.000622265	0.000576819
P06	PERI-M	Normal	Contrast	471.993	591.257
P06	PERI-M	VRF	Contrast	469.266	493.884
P06	PERI-M	Normal	Entropy	12.8155	12.7877
P06	PERI-M	VRF	Entropy	12.9268	13.0282
P06	PERI-M	Normal	FD	1.12589	1.10835
P06	PERI-M	VRF	FD	1.08984	1.04184
P06	PERI-M	Normal	IDM	0.145248	0.136329
P06	PERI-M	VRF	IDM	0.183882	0.191541
P06	PERI-M	Normal	Lacunarity	1.14615	1.15377
P06	PERI-M	VRF	Lacunarity	1.16401	1.16615
P06	PERI-D	Normal	ASM	0.00061898	0.00062814
P06	PERI-D	VRF	ASM	0.000595539	0.000539633
P06	PERI-D	Normal	Contrast	473.17	592.192
P06	PERI-D	VRF	Contrast	466.131	459.252
P06	PERI-D	Normal	Entropy	12.9351	12.9093
P06	PERI-D	VRF	Entropy	13.0173	13.1394
P06	PERI-D	Normal	FD	1.15239	1.16276
P06	PERI-D	VRF	FD	1.09497	1.03197
P06	PERI-D	Normal	IDM	0.14404	0.135853
P06	PERI-D	VRF	IDM	0.185787	0.193453
P06	PERI-D	Normal	Lacunarity	1.11765	1.12302
P06	PERI-D	VRF	Lacunarity	1.13106	1.13281
P07	AC-M	Normal	ASM	0.00156152	0.00151189
P07	AC-M	VRF	ASM	0.00141571	0.00142838
P07	AC-M	Normal	Contrast	880.961	836.034
P07	AC-M	VRF	Contrast	584.884	557.752
P07	AC-M	Normal	Entropy	11.4234	11.4531
P07	AC-M	VRF	Entropy	11.5301	11.5195
P07	AC-M	Normal	FD	1.08228	1.08231
P07	AC-M	VRF	FD	0.719658	0.761235
P07	AC-M	Normal	IDM	0.0987877	0.104107
P07	AC-M	VRF	IDM	0.111899	0.115934
P07	AC-M	Normal	Lacunarity	1.29849	1.29771
P07	AC-M	VRF	Lacunarity	1.29245	1.28526
P07	AC-D	Normal	ASM	0.00083654	0.000805552
P07	AC-D	VRF	ASM	0.000779092	0.000748182
P07	AC-D	Normal	Contrast	688.883	783.623
P07	AC-D	VRF	Contrast	449.826	425.359
P07	AC-D	Normal	Entropy	12.3492	12.3918
P07	AC-D	VRF	Entropy	12.4429	12.4803
P07	AC-D	Normal	FD	1.08291	1.10928
P07	AC-D	VRF	FD	0.949024	0.881266
P07	AC-D	Normal	IDM	0.114225	0.115146
P07	AC-D	VRF	IDM	0.159243	0.147886
P07	AC-D	Normal	Lacunarity	1.18385	1.18136
P07	AC-D	VRF	Lacunarity	1.22238	1.21253
P07	APEX	Normal	ASM	0.000384316	0.00035282
P07	APEX	VRF	ASM	0.000379719	0.000367571
P07	APEX	Normal	Contrast	512.353	486.162
P07	APEX	VRF	Contrast	300.838	342.74
P07	APEX	Normal	Entropy	13.5924	13.6976
P07	APEX	VRF	Entropy	13.6626	13.6877
P07	APEX	Normal	FD	1.1156	1.14168
P07	APEX	VRF	FD	1.08522	1.07742
P07	APEX	Normal	IDM	0.129029	0.13282
P07	APEX	VRF	IDM	0.203179	0.201405
P07	APEX	Normal	Lacunarity	1.14498	1.14645
P07	APEX	VRF	Lacunarity	1.17008	1.1656
P07	MID-M	Normal	ASM	0.000635938	0.000615672
P07	MID-M	VRF	ASM	0.000588933	0.000590123
P07	MID-M	Normal	Contrast	650.747	735.132
P07	MID-M	VRF	Contrast	550.437	520.003
P07	MID-M	Normal	Entropy	12.7882	12.823
P07	MID-M	VRF	Entropy	12.892	12.8892
P07	MID-M	Normal	FD	1.13538	1.14948
P07	MID-M	VRF	FD	0.97504	0.960559
P07	MID-M	Normal	IDM	0.118144	0.116503
P07	MID-M	VRF	IDM	0.163252	0.155407
P07	MID-M	Normal	Lacunarity	1.1258	1.12504
P07	MID-M	VRF	Lacunarity	1.14252	1.13047
P07	MID-D	Normal	ASM	0.000509789	0.000491067
P07	MID-D	VRF	ASM	0.000459808	0.000450883
P07	MID-D	Normal	Contrast	673.216	716.217
P07	MID-D	VRF	Contrast	561.813	575.444
P07	MID-D	Normal	Entropy	13.1246	13.1646
P07	MID-D	VRF	Entropy	13.2575	13.2784
P07	MID-D	Normal	FD	1.08273	1.02636
P07	MID-D	VRF	FD	0.992762	1.00323
P07	MID-D	Normal	IDM	0.117798	0.117647
P07	MID-D	VRF	IDM	0.171448	0.165251
P07	MID-D	Normal	Lacunarity	1.16152	1.1603
P07	MID-D	VRF	Lacunarity	1.17759	1.1766
P07	PERI-M	Normal	ASM	0.000451658	0.00042512
P07	PERI-M	VRF	ASM	0.000423628	0.0004057
P07	PERI-M	Normal	Contrast	640.701	676.311
P07	PERI-M	VRF	Contrast	416.174	436.591
P07	PERI-M	Normal	Entropy	13.3219	13.3903
P07	PERI-M	VRF	Entropy	13.4288	13.4666
P07	PERI-M	Normal	FD	1.11108	1.13259
P07	PERI-M	VRF	FD	1.02898	1.0208
P07	PERI-M	Normal	IDM	0.120158	0.1185
P07	PERI-M	VRF	IDM	0.192504	0.19234
P07	PERI-M	Normal	Lacunarity	1.14909	1.14829
P07	PERI-M	VRF	Lacunarity	1.16484	1.16255
P07	PERI-D	Normal	ASM	0.000405712	0.000372285
P07	PERI-D	VRF	ASM	0.000399306	0.00037725
P07	PERI-D	Normal	Contrast	518.614	489.275
P07	PERI-D	VRF	Contrast	370.311	398.045
P07	PERI-D	Normal	Entropy	13.4954	13.5968
P07	PERI-D	VRF	Entropy	13.5562	13.6031
P07	PERI-D	Normal	FD	1.1209	1.16713
P07	PERI-D	VRF	FD	1.08677	1.04532
P07	PERI-D	Normal	IDM	0.129678	0.132861
P07	PERI-D	VRF	IDM	0.195075	0.195607
P07	PERI-D	Normal	Lacunarity	1.11902	1.11987
P07	PERI-D	VRF	Lacunarity	1.14101	1.1382
P08	AC-M	Normal	ASM	0.00146248	0.00142192
P08	AC-M	VRF	ASM	0.00150549	0.00157741
P08	AC-M	Normal	Contrast	918.413	730.679
P08	AC-M	VRF	Contrast	488.096	550.092
P08	AC-M	Normal	Entropy	11.4954	11.5183
P08	AC-M	VRF	Entropy	11.4627	11.4296
P08	AC-M	Normal	FD	0.820282	0.815577
P08	AC-M	VRF	FD	0.921435	0.843749
P08	AC-M	Normal	IDM	0.102125	0.112958
P08	AC-M	VRF	IDM	0.124681	0.11916
P08	AC-M	Normal	Lacunarity	1.30502	1.30169
P08	AC-M	VRF	Lacunarity	1.28591	1.28407
P08	AC-D	Normal	ASM	0.000822821	0.000830943
P08	AC-D	VRF	ASM	0.000874771	0.000867121
P08	AC-D	Normal	Contrast	764.542	541.844
P08	AC-D	VRF	Contrast	432.554	470.213
P08	AC-D	Normal	Entropy	12.3708	12.3625
P08	AC-D	VRF	Entropy	12.3196	12.3497
P08	AC-D	Normal	FD	1.03121	1.0799
P08	AC-D	VRF	FD	0.963444	0.965382
P08	AC-D	Normal	IDM	0.113388	0.128845
P08	AC-D	VRF	IDM	0.145234	0.143531
P08	AC-D	Normal	Lacunarity	1.17857	1.18195
P08	AC-D	VRF	Lacunarity	1.17712	1.18026
P08	APEX	Normal	ASM	0.000367691	0.000373125
P08	APEX	VRF	ASM	0.000434065	0.000445821
P08	APEX	Normal	Contrast	481.46	508.341
P08	APEX	VRF	Contrast	248.108	307.063
P08	APEX	Normal	Entropy	13.6758	13.6534
P08	APEX	VRF	Entropy	13.5072	13.4648
P08	APEX	Normal	FD	1.06593	1.07198
P08	APEX	VRF	FD	0.970774	1.02255
P08	APEX	Normal	IDM	0.150943	0.153373
P08	APEX	VRF	IDM	0.180746	0.167099
P08	APEX	Normal	Lacunarity	1.14812	1.14884
P08	APEX	VRF	Lacunarity	1.14938	1.14881
P08	MID-M	Normal	ASM	0.000611151	0.00059469
P08	MID-M	VRF	ASM	0.000643408	0.00061808
P08	MID-M	Normal	Contrast	570.61	469.059
P08	MID-M	VRF	Contrast	404.659	483.657
P08	MID-M	Normal	Entropy	12.8422	12.8716
P08	MID-M	VRF	Entropy	12.8018	12.8487
P08	MID-M	Normal	FD	1.11531	1.12349
P08	MID-M	VRF	FD	0.938297	1.04187
P08	MID-M	Normal	IDM	0.126564	0.136261
P08	MID-M	VRF	IDM	0.144829	0.139718
P08	MID-M	Normal	Lacunarity	1.12823	1.13062
P08	MID-M	VRF	Lacunarity	1.12493	1.12563
P08	MID-D	Normal	ASM	0.000516289	0.000513607
P08	MID-D	VRF	ASM	0.000508878	0.000481162
P08	MID-D	Normal	Contrast	555.516	529.817
P08	MID-D	VRF	Contrast	268.275	454.344
P08	MID-D	Normal	Entropy	13.1332	13.1428
P08	MID-D	VRF	Entropy	13.1415	13.1981
P08	MID-D	Normal	FD	1.05244	1.06505
P08	MID-D	VRF	FD	0.893988	1.00247
P08	MID-D	Normal	IDM	0.141084	0.148392
P08	MID-D	VRF	IDM	0.167327	0.142673
P08	MID-D	Normal	Lacunarity	1.15877	1.16097
P08	MID-D	VRF	Lacunarity	1.15829	1.15905
P08	PERI-M	Normal	ASM	0.000435423	0.000431898
P08	PERI-M	VRF	ASM	0.000463551	0.000427953
P08	PERI-M	Normal	Contrast	567.238	543.876
P08	PERI-M	VRF	Contrast	271.751	433.46
P08	PERI-M	Normal	Entropy	13.3841	13.3982
P08	PERI-M	VRF	Entropy	13.3172	13.3976
P08	PERI-M	Normal	FD	1.08122	1.07516
P08	PERI-M	VRF	FD	0.970862	1.0261
P08	PERI-M	Normal	IDM	0.139704	0.146198
P08	PERI-M	VRF	IDM	0.169374	0.144971
P08	PERI-M	Normal	Lacunarity	1.15073	1.1512
P08	PERI-M	VRF	Lacunarity	1.15298	1.15214
P08	PERI-D	Normal	ASM	0.000398126	0.000408816
P08	PERI-D	VRF	ASM	0.000428255	0.000444976
P08	PERI-D	Normal	Contrast	471.424	512.303
P08	PERI-D	VRF	Contrast	258.974	318.932
P08	PERI-D	Normal	Entropy	13.5429	13.5098
P08	PERI-D	VRF	Entropy	13.4613	13.4143
P08	PERI-D	Normal	FD	1.08427	1.08919
P08	PERI-D	VRF	FD	0.980007	1.04132
P08	PERI-D	Normal	IDM	0.151916	0.154596
P08	PERI-D	VRF	IDM	0.175378	0.164063
P08	PERI-D	Normal	Lacunarity	1.12004	1.12068
P08	PERI-D	VRF	Lacunarity	1.12165	1.12135
P09	AC-M	Normal	ASM	0.00177064	0.0017059
P09	AC-M	VRF	ASM	0.00153779	0.00156153
P09	AC-M	Normal	Contrast	1131.98	1257.94
P09	AC-M	VRF	Contrast	478.102	698.709
P09	AC-M	Normal	Entropy	11.2833	11.3266
P09	AC-M	VRF	Entropy	11.4416	11.4265
P09	AC-M	Normal	FD	1.03313	0.953225
P09	AC-M	VRF	FD	0.949119	1.02109
P09	AC-M	Normal	IDM	0.104493	0.0966719
P09	AC-M	VRF	IDM	0.130828	0.114277
P09	AC-M	Normal	Lacunarity	1.29361	1.29451
P09	AC-M	VRF	Lacunarity	1.268	1.28172
P09	AC-D	Normal	ASM	0.00104187	0.00096636
P09	AC-D	VRF	ASM	0.000777114	0.000775409
P09	AC-D	Normal	Contrast	929.234	781.852
P09	AC-D	VRF	Contrast	581.074	701.968
P09	AC-D	Normal	Entropy	12.1042	12.1879
P09	AC-D	VRF	Entropy	12.4339	12.4361
P09	AC-D	Normal	FD	1.14789	1.13269
P09	AC-D	VRF	FD	0.993104	0.997031
P09	AC-D	Normal	IDM	0.108653	0.113342
P09	AC-D	VRF	IDM	0.144561	0.140817
P09	AC-D	Normal	Lacunarity	1.17515	1.16703
P09	AC-D	VRF	Lacunarity	1.16319	1.17633
P09	APEX	Normal	ASM	0.00044688	0.000424061
P09	APEX	VRF	ASM	0.000426275	0.000440671
P09	APEX	Normal	Contrast	358.64	392.295
P09	APEX	VRF	Contrast	262.077	274.454
P09	APEX	Normal	Entropy	13.4108	13.4839
P09	APEX	VRF	Entropy	13.4891	13.4625
P09	APEX	Normal	FD	1.13575	1.10132
P09	APEX	VRF	FD	1.10014	1.12356
P09	APEX	Normal	IDM	0.145672	0.143981
P09	APEX	VRF	IDM	0.170382	0.171363
P09	APEX	Normal	Lacunarity	1.15033	1.14903
P09	APEX	VRF	Lacunarity	1.15274	1.15283
P09	MID-M	Normal	ASM	0.000821807	0.000778314
P09	MID-M	VRF	ASM	0.000577288	0.00059539
P09	MID-M	Normal	Contrast	845.939	461.954
P09	MID-M	VRF	Contrast	392.228	472.945
P09	MID-M	Normal	Entropy	12.4891	12.5455
P09	MID-M	VRF	Entropy	12.902	12.8676
P09	MID-M	Normal	FD	1.17741	1.12963
P09	MID-M	VRF	FD	1.06065	1.06447
P09	MID-M	Normal	IDM	0.112218	0.134987
P09	MID-M	VRF	IDM	0.159755	0.156529
P09	MID-M	Normal	Lacunarity	1.12495	1.11872
P09	MID-M	VRF	Lacunarity	1.11775	1.11667
P09	MID-D	Normal	ASM	0.000707231	0.000668684
P09	MID-D	VRF	ASM	0.000508874	0.000498141
P09	MID-D	Normal	Contrast	811.897	483.808
P09	MID-D	VRF	Contrast	343.001	410.22
P09	MID-D	Normal	Entropy	12.734	12.8066
P09	MID-D	VRF	Entropy	13.1375	13.1587
P09	MID-D	Normal	FD	1.12997	1.1085
P09	MID-D	VRF	FD	1.0854	1.08034
P09	MID-D	Normal	IDM	0.1113	0.133362
P09	MID-D	VRF	IDM	0.162772	0.159453
P09	MID-D	Normal	Lacunarity	1.15737	1.15673
P09	MID-D	VRF	Lacunarity	1.15758	1.1545
P09	PERI-M	Normal	ASM	0.000593147	0.000572751
P09	PERI-M	VRF	ASM	0.000483744	0.000465824
P09	PERI-M	Normal	Contrast	676.451	450.056
P09	PERI-M	VRF	Contrast	315.128	344.057
P09	PERI-M	Normal	Entropy	12.9924	13.0373
P09	PERI-M	VRF	Entropy	13.2661	13.3071
P09	PERI-M	Normal	FD	1.155	1.11668
P09	PERI-M	VRF	FD	1.09163	1.12773
P09	PERI-M	Normal	IDM	0.119411	0.135542
P09	PERI-M	VRF	IDM	0.164552	0.162301
P09	PERI-M	Normal	Lacunarity	1.14992	1.15021
P09	PERI-M	VRF	Lacunarity	1.14971	1.1502
P09	PERI-D	Normal	ASM	0.000523536	0.000500428
P09	PERI-D	VRF	ASM	0.000459952	0.000450151
P09	PERI-D	Normal	Contrast	497.424	463.43
P09	PERI-D	VRF	Contrast	278.017	287.202
P09	PERI-D	Normal	Entropy	13.1801	13.2464
P09	PERI-D	VRF	Entropy	13.3736	13.3938
P09	PERI-D	Normal	FD	1.16515	1.12842
P09	PERI-D	VRF	FD	1.1241	1.14157
P09	PERI-D	Normal	IDM	0.13281	0.135261
P09	PERI-D	VRF	IDM	0.168281	0.169163
P09	PERI-D	Normal	Lacunarity	1.11761	1.11736
P09	PERI-D	VRF	Lacunarity	1.12635	1.12837
P10	AC-M	Normal	ASM	0.00196828	0.0020151
P10	AC-M	VRF	ASM	0.0014874	0.0015995
P10	AC-M	Normal	Contrast	683.178	779.371
P10	AC-M	VRF	Contrast	1006.71	740.345
P10	AC-M	Normal	Entropy	11.1701	11.1337
P10	AC-M	VRF	Entropy	11.4794	11.3887
P10	AC-M	Normal	FD	0.974812	1.08339
P10	AC-M	VRF	FD	0.877911	0.896639
P10	AC-M	Normal	IDM	0.121975	0.116839
P10	AC-M	VRF	IDM	0.101602	0.118201
P10	AC-M	Normal	Lacunarity	1.29375	1.30167
P10	AC-M	VRF	Lacunarity	1.29439	1.296
P10	AC-D	Normal	ASM	0.00117135	0.00115696
P10	AC-D	VRF	ASM	0.000833315	0.000825476
P10	AC-D	Normal	Contrast	698.265	686.928
P10	AC-D	VRF	Contrast	392.164	376.119
P10	AC-D	Normal	Entropy	11.964	11.9761
P10	AC-D	VRF	Entropy	12.3631	12.3694
P10	AC-D	Normal	FD	1.08602	1.135
P10	AC-D	VRF	FD	1.06184	1.02645
P10	AC-D	Normal	IDM	0.124312	0.126891
P10	AC-D	VRF	IDM	0.145546	0.151913
P10	AC-D	Normal	Lacunarity	1.17462	1.17473
P10	AC-D	VRF	Lacunarity	1.16	1.16262
P10	APEX	Normal	ASM	0.000539958	0.000500999
P10	APEX	VRF	ASM	0.000434145	0.00042585
P10	APEX	Normal	Contrast	471.486	442.359
P10	APEX	VRF	Contrast	285.693	212.068
P10	APEX	Normal	Entropy	13.1907	13.267
P10	APEX	VRF	Entropy	13.4649	13.4996
P10	APEX	Normal	FD	1.11576	1.16377
P10	APEX	VRF	FD	1.09788	1.11748
P10	APEX	Normal	IDM	0.144912	0.145583
P10	APEX	VRF	IDM	0.175614	0.188007
P10	APEX	Normal	Lacunarity	1.14851	1.14926
P10	APEX	VRF	Lacunarity	1.14608	1.14711
P10	MID-M	Normal	ASM	0.000834541	0.000820985
P10	MID-M	VRF	ASM	0.000683965	0.0006378
P10	MID-M	Normal	Contrast	571.434	619.589
P10	MID-M	VRF	Contrast	381.942	311.246
P10	MID-M	Normal	Entropy	12.4708	12.4812
P10	MID-M	VRF	Entropy	12.7167	12.7993
P10	MID-M	Normal	FD	1.14836	1.17171
P10	MID-M	VRF	FD	1.10367	1.11828
P10	MID-M	Normal	IDM	0.134652	0.132199
P10	MID-M	VRF	IDM	0.150677	0.158474
P10	MID-M	Normal	Lacunarity	1.12694	1.12667
P10	MID-M	VRF	Lacunarity	1.12055	1.12253
P10	MID-D	Normal	ASM	0.000691812	0.000716517
P10	MID-D	VRF	ASM	0.000510248	0.000484267
P10	MID-D	Normal	Contrast	641.988	595.507
P10	MID-D	VRF	Contrast	359.486	266.708
P10	MID-D	Normal	Entropy	12.7606	12.7235
P10	MID-D	VRF	Entropy	13.1351	13.1926
P10	MID-D	Normal	FD	1.09676	1.15601
P10	MID-D	VRF	FD	1.05204	1.05482
P10	MID-D	Normal	IDM	0.1318	0.131619
P10	MID-D	VRF	IDM	0.165957	0.177404
P10	MID-D	Normal	Lacunarity	1.1595	1.15998
P10	MID-D	VRF	Lacunarity	1.15663	1.15878
P10	PERI-M	Normal	ASM	0.000626205	0.000587248
P10	PERI-M	VRF	ASM	0.000456508	0.000441491
P10	PERI-M	Normal	Contrast	446.623	429.605
P10	PERI-M	VRF	Contrast	332.413	240.613
P10	PERI-M	Normal	Entropy	12.9469	13.0165
P10	PERI-M	VRF	Entropy	13.3219	13.3609
P10	PERI-M	Normal	FD	1.09628	1.15861
P10	PERI-M	VRF	FD	1.08142	1.0997
P10	PERI-M	Normal	IDM	0.146476	0.146848
P10	PERI-M	VRF	IDM	0.169621	0.182758
P10	PERI-M	Normal	Lacunarity	1.15267	1.1526
P10	PERI-M	VRF	Lacunarity	1.14809	1.15081
P10	PERI-D	Normal	ASM	0.000594394	0.00055218
P10	PERI-D	VRF	ASM	0.00043749	0.000429289
P10	PERI-D	Normal	Contrast	487.309	453.12
P10	PERI-D	VRF	Contrast	302.457	222.263
P10	PERI-D	Normal	Entropy	13.0451	13.1288
P10	PERI-D	VRF	Entropy	13.4169	13.4493
P10	PERI-D	Normal	FD	1.11838	1.16277
P10	PERI-D	VRF	FD	1.1018	1.13209
P10	PERI-D	Normal	IDM	0.1446	0.144826
P10	PERI-D	VRF	IDM	0.174222	0.187779
P10	PERI-D	Normal	Lacunarity	1.12153	1.12237
P10	PERI-D	VRF	Lacunarity	1.11993	1.12142
P11	AC-M	Normal	ASM	0.00149794	0.00153238
P11	AC-M	VRF	ASM	0.00151101	0.00153695
P11	AC-M	Normal	Contrast	771.554	802.001
P11	AC-M	VRF	Contrast	370.066	322.58
P11	AC-M	Normal	Entropy	11.4676	11.4416
P11	AC-M	VRF	Entropy	11.4563	11.4403
P11	AC-M	Normal	FD	0.988704	0.964072
P11	AC-M	VRF	FD	0.909714	0.998371
P11	AC-M	Normal	IDM	0.103962	0.10324
P11	AC-M	VRF	IDM	0.133728	0.139162
P11	AC-M	Normal	Lacunarity	1.30787	1.29862
P11	AC-M	VRF	Lacunarity	1.30205	1.3032
P11	AC-D	Normal	ASM	0.000782945	0.000760879
P11	AC-D	VRF	ASM	0.000831379	0.000799138
P11	AC-D	Normal	Contrast	687.387	545.952
P11	AC-D	VRF	Contrast	733.942	565.731
P11	AC-D	Normal	Entropy	12.4283	12.4556
P11	AC-D	VRF	Entropy	12.368	12.4091
P11	AC-D	Normal	FD	1.00516	0.993074
P11	AC-D	VRF	FD	1.07348	1.0231
P11	AC-D	Normal	IDM	0.135324	0.154323
P11	AC-D	VRF	IDM	0.14595	0.14999
P11	AC-D	Normal	Lacunarity	1.17382	1.17757
P11	AC-D	VRF	Lacunarity	1.18042	1.18253
P11	APEX	Normal	ASM	0.000429515	0.0004184
P11	APEX	VRF	ASM	0.000394861	0.000442038
P11	APEX	Normal	Contrast	426.322	319.023
P11	APEX	VRF	Contrast	332.172	304.527
P11	APEX	Normal	Entropy	13.5209	13.5483
P11	APEX	VRF	Entropy	13.5923	13.5114
P11	APEX	Normal	FD	1.04077	1.06674
P11	APEX	VRF	FD	1.08799	1.06386
P11	APEX	Normal	IDM	0.149104	0.171725
P11	APEX	VRF	IDM	0.172814	0.176615
P11	APEX	Normal	Lacunarity	1.14905	1.14977
P11	APEX	VRF	Lacunarity	1.14598	1.14604
P11	MID-M	Normal	ASM	0.000606931	0.000571703
P11	MID-M	VRF	ASM	0.000649291	0.000592027
P11	MID-M	Normal	Contrast	583.681	473.361
P11	MID-M	VRF	Contrast	636.982	548.298
P11	MID-M	Normal	Entropy	12.8615	12.9128
P11	MID-M	VRF	Entropy	12.7893	12.8874
P11	MID-M	Normal	FD	1.03862	1.10558
P11	MID-M	VRF	FD	1.12708	1.01575
P11	MID-M	Normal	IDM	0.139977	0.160077
P11	MID-M	VRF	IDM	0.145687	0.148902
P11	MID-M	Normal	Lacunarity	1.12913	1.13321
P11	MID-M	VRF	Lacunarity	1.12587	1.12869
P11	MID-D	Normal	ASM	0.000495778	0.000453908
P11	MID-D	VRF	ASM	0.000488481	0.000489345
P11	MID-D	Normal	Contrast	528.678	428.931
P11	MID-D	VRF	Contrast	466.742	384.278
P11	MID-D	Normal	Entropy	13.1789	13.2622
P11	MID-D	VRF	Entropy	13.1885	13.1977
P11	MID-D	Normal	FD	1.02266	1.06638
P11	MID-D	VRF	FD	1.0403	0.999304
P11	MID-D	Normal	IDM	0.140485	0.160145
P11	MID-D	VRF	IDM	0.159648	0.162984
P11	MID-D	Normal	Lacunarity	1.16255	1.16483
P11	MID-D	VRF	Lacunarity	1.15902	1.1611
P11	PERI-M	Normal	ASM	0.000456957	0.000419113
P11	PERI-M	VRF	ASM	0.00046185	0.000472382
P11	PERI-M	Normal	Contrast	496.435	387.083
P11	PERI-M	VRF	Contrast	412.11	346.188
P11	PERI-M	Normal	Entropy	13.3366	13.4243
P11	PERI-M	VRF	Entropy	13.3258	13.3273
P11	PERI-M	Normal	FD	1.04965	1.06067
P11	PERI-M	VRF	FD	1.07655	1.01127
P11	PERI-M	Normal	IDM	0.142381	0.164608
P11	PERI-M	VRF	IDM	0.164056	0.169388
P11	PERI-M	Normal	Lacunarity	1.1513	1.15471
P11	PERI-M	VRF	Lacunarity	1.14849	1.14975
P11	PERI-D	Normal	ASM	0.000429897	0.000400494
P11	PERI-D	VRF	ASM	0.000409882	0.000416081
P11	PERI-D	Normal	Contrast	461.316	351.664
P11	PERI-D	VRF	Contrast	353.769	330.399
P11	PERI-D	Normal	Entropy	13.465	13.5324
P11	PERI-D	VRF	Entropy	13.5063	13.5079
P11	PERI-D	Normal	FD	1.05451	1.07114
P11	PERI-D	VRF	FD	1.08784	1.03219
P11	PERI-D	Normal	IDM	0.144306	0.16698
P11	PERI-D	VRF	IDM	0.17169	0.172497
P11	PERI-D	Normal	Lacunarity	1.12292	1.12438
P11	PERI-D	VRF	Lacunarity	1.11946	1.12084
P12	AC-M	Normal	ASM	0.00148194	0.00143572
P12	AC-M	VRF	ASM	0.00161535	0.00151122
P12	AC-M	Normal	Contrast	801.923	815.424
P12	AC-M	VRF	Contrast	941.978	767.733
P12	AC-M	Normal	Entropy	11.4757	11.5125
P12	AC-M	VRF	Entropy	11.3814	11.4546
P12	AC-M	Normal	FD	0.94679	0.808082
P12	AC-M	VRF	FD	0.99496	0.975549
P12	AC-M	Normal	IDM	0.113726	0.110004
P12	AC-M	VRF	IDM	0.10617	0.110349
P12	AC-M	Normal	Lacunarity	1.32122	1.30686
P12	AC-M	VRF	Lacunarity	1.31002	1.30916
P12	AC-D	Normal	ASM	0.000871769	0.000846263
P12	AC-D	VRF	ASM	0.000943002	0.000917766
P12	AC-D	Normal	Contrast	808.358	808.003
P12	AC-D	VRF	Contrast	671.036	591.604
P12	AC-D	Normal	Entropy	12.2994	12.3354
P12	AC-D	VRF	Entropy	12.2129	12.2369
P12	AC-D	Normal	FD	1.02486	0.979518
P12	AC-D	VRF	FD	1.00521	1.02748
P12	AC-D	Normal	IDM	0.116682	0.117308
P12	AC-D	VRF	IDM	0.122241	0.124635
P12	AC-D	Normal	Lacunarity	1.18309	1.18103
P12	AC-D	VRF	Lacunarity	1.18286	1.18304
P12	APEX	Normal	ASM	0.000455822	0.00042671
P12	APEX	VRF	ASM	0.000480636	0.000484938
P12	APEX	Normal	Contrast	372.799	430.148
P12	APEX	VRF	Contrast	423.504	470.304
P12	APEX	Normal	Entropy	13.4537	13.5155
P12	APEX	VRF	Entropy	13.3348	13.2949
P12	APEX	Normal	FD	1.08873	1.07704
P12	APEX	VRF	FD	1.1031	1.10101
P12	APEX	Normal	IDM	0.147115	0.14731
P12	APEX	VRF	IDM	0.140467	0.136374
P12	APEX	Normal	Lacunarity	1.1485	1.14674
P12	APEX	VRF	Lacunarity	1.14854	1.14607
P12	MID-M	Normal	ASM	0.000615949	0.000627299
P12	MID-M	VRF	ASM	0.000716563	0.000737404
P12	MID-M	Normal	Contrast	507.327	458.065
P12	MID-M	VRF	Contrast	620.266	539.787
P12	MID-M	Normal	Entropy	12.8211	12.8152
P12	MID-M	VRF	Entropy	12.6498	12.6194
P12	MID-M	Normal	FD	1.12554	1.08167
P12	MID-M	VRF	FD	1.10062	1.10317
P12	MID-M	Normal	IDM	0.134787	0.140709
P12	MID-M	VRF	IDM	0.126118	0.130385
P12	MID-M	Normal	Lacunarity	1.13212	1.12977
P12	MID-M	VRF	Lacunarity	1.1274	1.12841
P12	MID-D	Normal	ASM	0.000554557	0.000523245
P12	MID-D	VRF	ASM	0.000604888	0.000625146
P12	MID-D	Normal	Contrast	420.836	564.565
P12	MID-D	VRF	Contrast	584.546	552.469
P12	MID-D	Normal	Entropy	13.0462	13.1073
P12	MID-D	VRF	Entropy	12.9189	12.8838
P12	MID-D	Normal	FD	1.06625	1.01684
P12	MID-D	VRF	FD	1.03449	1.0524
P12	MID-D	Normal	IDM	0.142982	0.141971
P12	MID-D	VRF	IDM	0.126708	0.130357
P12	MID-D	Normal	Lacunarity	1.16459	1.16412
P12	MID-D	VRF	Lacunarity	1.16017	1.15985
P12	PERI-M	Normal	ASM	0.000518737	0.000448555
P12	PERI-M	VRF	ASM	0.000520604	0.000528517
P12	PERI-M	Normal	Contrast	407.169	444.875
P12	PERI-M	VRF	Contrast	493.943	483.229
P12	PERI-M	Normal	Entropy	13.2146	13.3429
P12	PERI-M	VRF	Entropy	13.1448	13.1262
P12	PERI-M	Normal	FD	1.09523	1.04438
P12	PERI-M	VRF	FD	1.06392	1.05465
P12	PERI-M	Normal	IDM	0.144089	0.145994
P12	PERI-M	VRF	IDM	0.13305	0.133968
P12	PERI-M	Normal	Lacunarity	1.15449	1.15303
P12	PERI-M	VRF	Lacunarity	1.15096	1.15019
P12	PERI-D	Normal	ASM	0.00046825	0.000430721
P12	PERI-D	VRF	ASM	0.000492247	0.000495308
P12	PERI-D	Normal	Contrast	388.582	431.032
P12	PERI-D	VRF	Contrast	432.816	491.569
P12	PERI-D	Normal	Entropy	13.3826	13.4539
P12	PERI-D	VRF	Entropy	13.2637	13.2353
P12	PERI-D	Normal	FD	1.11172	1.0761
P12	PERI-D	VRF	FD	1.10542	1.09524
P12	PERI-D	Normal	IDM	0.146339	0.145858
P12	PERI-D	VRF	IDM	0.139598	0.133647
P12	PERI-D	Normal	Lacunarity	1.12397	1.12179
P12	PERI-D	VRF	Lacunarity	1.12205	1.12003
P13	AC-M	Normal	ASM	0.00191889	0.00180519
P13	AC-M	VRF	ASM	0.00216986	0.00218375
P13	AC-M	Normal	Contrast	971.242	1012.77
P13	AC-M	VRF	Contrast	1029.31	351.732
P13	AC-M	Normal	Entropy	11.199	11.2687
P13	AC-M	VRF	Entropy	11.0597	11.0693
P13	AC-M	Normal	FD	0.821247	0.891748
P13	AC-M	VRF	FD	0.935723	0.907198
P13	AC-M	Normal	IDM	0.106821	0.106268
P13	AC-M	VRF	IDM	0.109481	0.153533
P13	AC-M	Normal	Lacunarity	1.29416	1.29682
P13	AC-M	VRF	Lacunarity	1.29508	1.30387
P13	AC-D	Normal	ASM	0.00120431	0.00116817
P13	AC-D	VRF	ASM	0.0011023	0.0011796
P13	AC-D	Normal	Contrast	986.322	996.599
P13	AC-D	VRF	Contrast	694.232	216.535
P13	AC-D	Normal	Entropy	11.9254	11.9603
P13	AC-D	VRF	Entropy	12.0295	11.9806
P13	AC-D	Normal	FD	1.03639	1.01659
P13	AC-D	VRF	FD	1.05456	1.14274
P13	AC-D	Normal	IDM	0.106097	0.107733
P13	AC-D	VRF	IDM	0.123725	0.169648
P13	AC-D	Normal	Lacunarity	1.17568	1.17344
P13	AC-D	VRF	Lacunarity	1.17029	1.17143
P13	APEX	Normal	ASM	0.000497555	0.000513093
P13	APEX	VRF	ASM	0.000630115	0.00061328
P13	APEX	Normal	Contrast	467.9	402.846
P13	APEX	VRF	Contrast	660.086	256.547
P13	APEX	Normal	Entropy	13.2466	13.2056
P13	APEX	VRF	Entropy	12.9509	13.0016
P13	APEX	Normal	FD	1.12452	1.13003
P13	APEX	VRF	FD	1.11313	1.10813
P13	APEX	Normal	IDM	0.146572	0.155667
P13	APEX	VRF	IDM	0.131693	0.170543
P13	APEX	Normal	Lacunarity	1.14928	1.1501
P13	APEX	VRF	Lacunarity	1.14414	1.14545
P13	MID-M	Normal	ASM	0.000931282	0.000961292
P13	MID-M	VRF	ASM	0.000892146	0.000964446
P13	MID-M	Normal	Contrast	838.579	959.239
P13	MID-M	VRF	Contrast	743.694	228.022
P13	MID-M	Normal	Entropy	12.3157	12.2791
P13	MID-M	VRF	Entropy	12.3844	12.3205
P13	MID-M	Normal	FD	1.12244	1.13007
P13	MID-M	VRF	FD	1.10629	1.13186
P13	MID-M	Normal	IDM	0.115142	0.110311
P13	MID-M	VRF	IDM	0.124857	0.168621
P13	MID-M	Normal	Lacunarity	1.12494	1.12595
P13	MID-M	VRF	Lacunarity	1.12506	1.12592
P13	MID-D	Normal	ASM	0.000790342	0.000800526
P13	MID-D	VRF	ASM	0.0007583	0.000751927
P13	MID-D	Normal	Contrast	614.305	701.835
P13	MID-D	VRF	Contrast	766.971	230.124
P13	MID-D	Normal	Entropy	12.5743	12.5613
P13	MID-D	VRF	Entropy	12.6247	12.6621
P13	MID-D	Normal	FD	1.0928	1.09325
P13	MID-D	VRF	FD	1.04875	1.09746
P13	MID-D	Normal	IDM	0.126511	0.122757
P13	MID-D	VRF	IDM	0.127045	0.172392
P13	MID-D	Normal	Lacunarity	1.15746	1.15899
P13	MID-D	VRF	Lacunarity	1.15623	1.15687
P13	PERI-M	Normal	ASM	0.00064379	0.000634475
P13	PERI-M	VRF	ASM	0.000659877	0.000655534
P13	PERI-M	Normal	Contrast	525.134	471.542
P13	PERI-M	VRF	Contrast	678.827	259.793
P13	PERI-M	Normal	Entropy	12.8708	12.8987
P13	PERI-M	VRF	Entropy	12.8366	12.8715
P13	PERI-M	Normal	FD	1.1288	1.10073
P13	PERI-M	VRF	FD	1.09098	1.11003
P13	PERI-M	Normal	IDM	0.136612	0.141285
P13	PERI-M	VRF	IDM	0.131724	0.167938
P13	PERI-M	Normal	Lacunarity	1.15257	1.1552
P13	PERI-M	VRF	Lacunarity	1.14886	1.15056
P13	PERI-D	Normal	ASM	0.000582936	0.000576921
P13	PERI-D	VRF	ASM	0.000640495	0.000616923
P13	PERI-D	Normal	Contrast	578.674	519.299
P13	PERI-D	VRF	Contrast	683.889	268.178
P13	PERI-D	Normal	Entropy	13.0213	13.0458
P13	PERI-D	VRF	Entropy	12.9058	12.9655
P13	PERI-D	Normal	FD	1.15036	1.15034
P13	PERI-D	VRF	FD	1.12476	1.11598
P13	PERI-D	Normal	IDM	0.137029	0.144778
P13	PERI-D	VRF	IDM	0.13181	0.170001
P13	PERI-D	Normal	Lacunarity	1.12	1.12207
P13	PERI-D	VRF	Lacunarity	1.11896	1.11964
P14	AC-M	Normal	ASM	0.00153102	0.00154154
P14	AC-M	VRF	ASM	0.00147501	0.00144859
P14	AC-M	Normal	Contrast	873.485	849.97
P14	AC-M	VRF	Contrast	453.357	455.862
P14	AC-M	Normal	Entropy	11.4438	11.4377
P14	AC-M	VRF	Entropy	11.4842	11.5034
P14	AC-M	Normal	FD	0.879122	1.01291
P14	AC-M	VRF	FD	0.890331	0.874894
P14	AC-M	Normal	IDM	0.104245	0.101668
P14	AC-M	VRF	IDM	0.135302	0.132731
P14	AC-M	Normal	Lacunarity	1.3119	1.32767
P14	AC-M	VRF	Lacunarity	1.30105	1.30724
P14	AC-D	Normal	ASM	0.000811468	0.000792577
P14	AC-D	VRF	ASM	0.000811316	0.000803008
P14	AC-D	Normal	Contrast	602.794	697.623
P14	AC-D	VRF	Contrast	372.302	309.066
P14	AC-D	Normal	Entropy	12.3882	12.4106
P14	AC-D	VRF	Entropy	12.3892	12.4034
P14	AC-D	Normal	FD	1.04199	1.03277
P14	AC-D	VRF	FD	1.05129	0.978154
P14	AC-D	Normal	IDM	0.13382	0.133911
P14	AC-D	VRF	IDM	0.153772	0.16076
P14	AC-D	Normal	Lacunarity	1.18553	1.18736
P14	AC-D	VRF	Lacunarity	1.21081	1.19918
P14	APEX	Normal	ASM	0.000358717	0.000328243
P14	APEX	VRF	ASM	0.000377323	0.00035982
P14	APEX	Normal	Contrast	461.483	517.556
P14	APEX	VRF	Contrast	210.837	228.197
P14	APEX	Normal	Entropy	13.6844	13.7836
P14	APEX	VRF	Entropy	13.6316	13.6903
P14	APEX	Normal	FD	1.06357	1.09618
P14	APEX	VRF	FD	1.11572	1.07102
P14	APEX	Normal	IDM	0.146059	0.145584
P14	APEX	VRF	IDM	0.181423	0.184483
P14	APEX	Normal	Lacunarity	1.15573	1.15776
P14	APEX	VRF	Lacunarity	1.16515	1.16447
P14	MID-M	Normal	ASM	0.000583505	0.000578488
P14	MID-M	VRF	ASM	0.000586561	0.00057074
P14	MID-M	Normal	Contrast	555.365	648.405
P14	MID-M	VRF	Contrast	411.154	487.733
P14	MID-M	Normal	Entropy	12.8854	12.8947
P14	MID-M	VRF	Entropy	12.8831	12.9151
P14	MID-M	Normal	FD	1.0929	1.09676
P14	MID-M	VRF	FD	1.08108	0.995754
P14	MID-M	Normal	IDM	0.134056	0.134842
P14	MID-M	VRF	IDM	0.154454	0.160503
P14	MID-M	Normal	Lacunarity	1.13927	1.14514
P14	MID-M	VRF	Lacunarity	1.16318	1.16555
P14	MID-D	Normal	ASM	0.000486719	0.000473555
P14	MID-D	VRF	ASM	0.000491423	0.000479603
P14	MID-D	Normal	Contrast	581.692	613.751
P14	MID-D	VRF	Contrast	293.821	342.36
P14	MID-D	Normal	Entropy	13.1781	13.2064
P14	MID-D	VRF	Entropy	13.1771	13.2025
P14	MID-D	Normal	FD	1.0579	1.05746
P14	MID-D	VRF	FD	1.05423	1.03083
P14	MID-D	Normal	IDM	0.137917	0.1368
P14	MID-D	VRF	IDM	0.16871	0.173688
P14	MID-D	Normal	Lacunarity	1.17211	1.17497
P14	MID-D	VRF	Lacunarity	1.18345	1.18413
P14	PERI-M	Normal	ASM	0.000429825	0.000406762
P14	PERI-M	VRF	ASM	0.000440078	0.000419034
P14	PERI-M	Normal	Contrast	564.013	571.051
P14	PERI-M	VRF	Contrast	277.32	305.885
P14	PERI-M	Normal	Entropy	13.3812	13.444
P14	PERI-M	VRF	Entropy	13.3678	13.4183
P14	PERI-M	Normal	FD	1.07585	1.09864
P14	PERI-M	VRF	FD	1.08948	1.05768
P14	PERI-M	Normal	IDM	0.137389	0.136365
P14	PERI-M	VRF	IDM	0.170668	0.175812
P14	PERI-M	Normal	Lacunarity	1.16062	1.16979
P14	PERI-M	VRF	Lacunarity	1.16933	1.16714
P14	PERI-D	Normal	ASM	0.000409457	0.000360868
P14	PERI-D	VRF	ASM	0.000399333	0.000374752
P14	PERI-D	Normal	Contrast	533.781	533.914
P14	PERI-D	VRF	Contrast	210.225	238.319
P14	PERI-D	Normal	Entropy	13.485	13.6303
P14	PERI-D	VRF	Entropy	13.5303	13.5975
P14	PERI-D	Normal	FD	1.06388	1.11409
P14	PERI-D	VRF	FD	1.1336	1.11451
P14	PERI-D	Normal	IDM	0.137571	0.142562
P14	PERI-D	VRF	IDM	0.18374	0.185517
P14	PERI-D	Normal	Lacunarity	1.12933	1.13451
P14	PERI-D	VRF	Lacunarity	1.14092	1.14194
P15	AC-M	Normal	ASM	0.00164511	0.00170635
P15	AC-M	VRF	ASM	0.00156249	0.00152484
P15	AC-M	Normal	Contrast	804.398	714.326
P15	AC-M	VRF	Contrast	416.752	465.262
P15	AC-M	Normal	Entropy	11.3669	11.3318
P15	AC-M	VRF	Entropy	11.42	11.4487
P15	AC-M	Normal	FD	0.862916	0.9
P15	AC-M	VRF	FD	0.947306	0.852856
P15	AC-M	Normal	IDM	0.118468	0.121069
P15	AC-M	VRF	IDM	0.135622	0.128983
P15	AC-M	Normal	Lacunarity	1.28395	1.28229
P15	AC-M	VRF	Lacunarity	1.26712	1.27614
P15	AC-D	Normal	ASM	0.000994812	0.0010137
P15	AC-D	VRF	ASM	0.000876212	0.000839419
P15	AC-D	Normal	Contrast	610.631	701.317
P15	AC-D	VRF	Contrast	393.168	324.149
P15	AC-D	Normal	Entropy	12.1572	12.1262
P15	AC-D	VRF	Entropy	12.2953	12.3567
P15	AC-D	Normal	FD	1.04517	1.01749
P15	AC-D	VRF	FD	1.01828	1.13781
P15	AC-D	Normal	IDM	0.126038	0.122381
P15	AC-D	VRF	IDM	0.140089	0.167976
P15	AC-D	Normal	Lacunarity	1.16829	1.1713
P15	AC-D	VRF	Lacunarity	1.15769	1.19563
P15	APEX	Normal	ASM	0.000512778	0.000499205
P15	APEX	VRF	ASM	0.000424372	0.000451289
P15	APEX	Normal	Contrast	628.756	468.868
P15	APEX	VRF	Contrast	263.489	224.043
P15	APEX	Normal	Entropy	13.224	13.2538
P15	APEX	VRF	Entropy	13.4697	13.421
P15	APEX	Normal	FD	1.07573	1.08692
P15	APEX	VRF	FD	1.10522	1.09532
P15	APEX	Normal	IDM	0.124919	0.139793
P15	APEX	VRF	IDM	0.172652	0.185519
P15	APEX	Normal	Lacunarity	1.14634	1.15047
P15	APEX	VRF	Lacunarity	1.1457	1.15311
P15	MID-M	Normal	ASM	0.000777974	0.000745046
P15	MID-M	VRF	ASM	0.000655445	0.000640038
P15	MID-M	Normal	Contrast	658.88	582.466
P15	MID-M	VRF	Contrast	333.54	291.977
P15	MID-M	Normal	Entropy	12.5493	12.5966
P15	MID-M	VRF	Entropy	12.7492	12.7926
P15	MID-M	Normal	FD	1.07621	1.06441
P15	MID-M	VRF	FD	1.1064	1.17115
P15	MID-M	Normal	IDM	0.123126	0.124593
P15	MID-M	VRF	IDM	0.14987	0.173911
P15	MID-M	Normal	Lacunarity	1.1267	1.12796
P15	MID-M	VRF	Lacunarity	1.11463	1.13518
P15	MID-D	Normal	ASM	0.000636407	0.000633478
P15	MID-D	VRF	ASM	0.000573866	0.000568659
P15	MID-D	Normal	Contrast	677.863	605.188
P15	MID-D	VRF	Contrast	350.821	268.501
P15	MID-D	Normal	Entropy	12.8539	12.8545
P15	MID-D	VRF	Entropy	12.9803	13.0161
P15	MID-D	Normal	FD	1.025	1.02753
P15	MID-D	VRF	FD	1.06435	1.09876
P15	MID-D	Normal	IDM	0.122517	0.124838
P15	MID-D	VRF	IDM	0.152158	0.179512
P15	MID-D	Normal	Lacunarity	1.15649	1.16233
P15	MID-D	VRF	Lacunarity	1.15415	1.17121
P15	PERI-M	Normal	ASM	0.000590421	0.000593002
P15	PERI-M	VRF	ASM	0.000477334	0.000489461
P15	PERI-M	Normal	Contrast	681.945	608.972
P15	PERI-M	VRF	Contrast	298.794	263.383
P15	PERI-M	Normal	Entropy	12.99	12.9766
P15	PERI-M	VRF	Entropy	13.2486	13.2389
P15	PERI-M	Normal	FD	1.08625	1.09546
P15	PERI-M	VRF	FD	1.08186	1.09649
P15	PERI-M	Normal	IDM	0.123284	0.126972
P15	PERI-M	VRF	IDM	0.16639	0.17994
P15	PERI-M	Normal	Lacunarity	1.14741	1.15235
P15	PERI-M	VRF	Lacunarity	1.14464	1.15504
P15	PERI-D	Normal	ASM	0.000545622	0.000550061
P15	PERI-D	VRF	ASM	0.000451461	0.00048019
P15	PERI-D	Normal	Contrast	667.831	654.358
P15	PERI-D	VRF	Contrast	285.631	237.67
P15	PERI-D	Normal	Entropy	13.119	13.1078
P15	PERI-D	VRF	Entropy	13.3555	13.3172
P15	PERI-D	Normal	FD	1.09126	1.09629
P15	PERI-D	VRF	FD	1.0999	1.11622
P15	PERI-D	Normal	IDM	0.122903	0.127179
P15	PERI-D	VRF	IDM	0.170044	0.186237
P15	PERI-D	Normal	Lacunarity	1.11913	1.12219
P15	PERI-D	VRF	Lacunarity	1.12036	1.129
P16	AC-M	Normal	ASM	0.00135961	0.00144708
P16	AC-M	VRF	ASM	0.0014004	0.00141559
P16	AC-M	Normal	Contrast	405.758	348.393
P16	AC-M	VRF	Contrast	619.453	637.503
P16	AC-M	Normal	Entropy	11.5711	11.5045
P16	AC-M	VRF	Entropy	11.545	11.5313
P16	AC-M	Normal	FD	1.01401	0.842206
P16	AC-M	VRF	FD	0.950369	0.825886
P16	AC-M	Normal	IDM	0.128488	0.149164
P16	AC-M	VRF	IDM	0.124381	0.129157
P16	AC-M	Normal	Lacunarity	1.25478	1.30101
P16	AC-M	VRF	Lacunarity	1.29631	1.29889
P16	AC-D	Normal	ASM	0.00082948	0.000843749
P16	AC-D	VRF	ASM	0.000744641	0.000756137
P16	AC-D	Normal	Contrast	348.397	382.201
P16	AC-D	VRF	Contrast	497.846	338.757
P16	AC-D	Normal	Entropy	12.3665	12.3554
P16	AC-D	VRF	Entropy	12.4901	12.4696
P16	AC-D	Normal	FD	0.988226	0.752042
P16	AC-D	VRF	FD	1.01644	1.02859
P16	AC-D	Normal	IDM	0.206013	0.202229
P16	AC-D	VRF	IDM	0.166129	0.165134
P16	AC-D	Normal	Lacunarity	1.17465	1.17805
P16	AC-D	VRF	Lacunarity	1.17119	1.17087
P16	APEX	Normal	ASM	0.000427993	0.000403622
P16	APEX	VRF	ASM	0.000360308	0.000311917
P16	APEX	Normal	Contrast	305.115	315.135
P16	APEX	VRF	Contrast	331.268	363.071
P16	APEX	Normal	Entropy	13.4947	13.5838
P16	APEX	VRF	Entropy	13.6936	13.859
P16	APEX	Normal	FD	1.03783	0.888515
P16	APEX	VRF	FD	1.05263	1.02834
P16	APEX	Normal	IDM	0.246332	0.243729
P16	APEX	VRF	IDM	0.204565	0.185979
P16	APEX	Normal	Lacunarity	1.15466	1.15829
P16	APEX	VRF	Lacunarity	1.14763	1.1427
P16	MID-M	Normal	ASM	0.000642471	0.000622869
P16	MID-M	VRF	ASM	0.000587986	0.000550603
P16	MID-M	Normal	Contrast	418.355	373.648
P16	MID-M	VRF	Contrast	303.057	285.587
P16	MID-M	Normal	Entropy	12.791	12.8329
P16	MID-M	VRF	Entropy	12.8865	12.9545
P16	MID-M	Normal	FD	1.04423	0.839204
P16	MID-M	VRF	FD	1.08607	1.07812
P16	MID-M	Normal	IDM	0.222203	0.221778
P16	MID-M	VRF	IDM	0.201586	0.171541
P16	MID-M	Normal	Lacunarity	1.14819	1.14196
P16	MID-M	VRF	Lacunarity	1.1293	1.12553
P16	MID-D	Normal	ASM	0.000495839	0.000507352
P16	MID-D	VRF	ASM	0.000475708	0.000443472
P16	MID-D	Normal	Contrast	429.68	388.16
P16	MID-D	VRF	Contrast	386.537	436.092
P16	MID-D	Normal	Entropy	13.1667	13.1459
P16	MID-D	VRF	Entropy	13.2123	13.2958
P16	MID-D	Normal	FD	0.964399	0.855918
P16	MID-D	VRF	FD	1.03516	0.990193
P16	MID-D	Normal	IDM	0.228146	0.227272
P16	MID-D	VRF	IDM	0.197772	0.172246
P16	MID-D	Normal	Lacunarity	1.17122	1.17264
P16	MID-D	VRF	Lacunarity	1.159	1.15757
P16	PERI-M	Normal	ASM	0.000485846	0.000442258
P16	PERI-M	VRF	ASM	0.00041122	0.000371441
P16	PERI-M	Normal	Contrast	383.559	372.172
P16	PERI-M	VRF	Contrast	364.871	386.271
P16	PERI-M	Normal	Entropy	13.271	13.3751
P16	PERI-M	VRF	Entropy	13.4469	13.5637
P16	PERI-M	Normal	FD	1.01705	0.785629
P16	PERI-M	VRF	FD	1.05318	1.04611
P16	PERI-M	Normal	IDM	0.234962	0.228285
P16	PERI-M	VRF	IDM	0.202725	0.180436
P16	PERI-M	Normal	Lacunarity	1.16619	1.17309
P16	PERI-M	VRF	Lacunarity	1.15369	1.15384
P16	PERI-D	Normal	ASM	0.000450117	0.000412229
P16	PERI-D	VRF	ASM	0.00037301	0.000330353
P16	PERI-D	Normal	Contrast	341.343	354.886
P16	PERI-D	VRF	Contrast	367.274	399.8
P16	PERI-D	Normal	Entropy	13.4023	13.5105
P16	PERI-D	VRF	Entropy	13.6125	13.7497
P16	PERI-D	Normal	FD	1.03422	0.816136
P16	PERI-D	VRF	FD	1.05908	1.02732
P16	PERI-D	Normal	IDM	0.241178	0.239949
P16	PERI-D	VRF	IDM	0.200765	0.180597
P16	PERI-D	Normal	Lacunarity	1.12939	1.13381
P16	PERI-D	VRF	Lacunarity	1.12072	1.12034
P17	AC-M	Normal	ASM	0.0019797	0.00198939
P17	AC-M	VRF	ASM	0.00157321	0.00163728
P17	AC-M	Normal	Contrast	915.497	494.716
P17	AC-M	VRF	Contrast	352.231	382.666
P17	AC-M	Normal	Entropy	11.1604	11.185
P17	AC-M	VRF	Entropy	11.411	11.3686
P17	AC-M	Normal	FD	1.13502	1.02408
P17	AC-M	VRF	FD	1.08863	1.02529
P17	AC-M	Normal	IDM	0.111511	0.137359
P17	AC-M	VRF	IDM	0.146621	0.140864
P17	AC-M	Normal	Lacunarity	1.30267	1.27252
P17	AC-M	VRF	Lacunarity	1.25081	1.26228
P17	AC-D	Normal	ASM	0.00102079	0.000982456
P17	AC-D	VRF	ASM	0.000797927	0.000828098
P17	AC-D	Normal	Contrast	517.248	375.134
P17	AC-D	VRF	Contrast	728.835	627.901
P17	AC-D	Normal	Entropy	12.1334	12.1925
P17	AC-D	VRF	Entropy	12.4041	12.3643
P17	AC-D	Normal	FD	1.09226	1.00013
P17	AC-D	VRF	FD	1.07419	1.02859
P17	AC-D	Normal	IDM	0.145897	0.17006
P17	AC-D	VRF	IDM	0.163634	0.160551
P17	AC-D	Normal	Lacunarity	1.18372	1.17569
P17	AC-D	VRF	Lacunarity	1.19521	1.18816
P17	APEX	Normal	ASM	0.000577621	0.00057528
P17	APEX	VRF	ASM	0.000462689	0.000509529
P17	APEX	Normal	Contrast	416.799	267.9
P17	APEX	VRF	Contrast	367.055	372.706
P17	APEX	Normal	Entropy	13.0715	13.095
P17	APEX	VRF	Entropy	13.388	13.2687
P17	APEX	Normal	FD	1.1343	1.12198
P17	APEX	VRF	FD	1.12738	1.11025
P17	APEX	Normal	IDM	0.147735	0.170009
P17	APEX	VRF	IDM	0.166365	0.162303
P17	APEX	Normal	Lacunarity	1.14832	1.14813
P17	APEX	VRF	Lacunarity	1.15226	1.15214
P17	MID-M	Normal	ASM	0.000821473	0.000816551
P17	MID-M	VRF	ASM	0.000616318	0.000664004
P17	MID-M	Normal	Contrast	455.538	334.23
P17	MID-M	VRF	Contrast	561.211	534.963
P17	MID-M	Normal	Entropy	12.4872	12.5179
P17	MID-M	VRF	Entropy	12.832	12.751
P17	MID-M	Normal	FD	1.13651	1.07927
P17	MID-M	VRF	FD	1.11964	1.05019
P17	MID-M	Normal	IDM	0.149257	0.173236
P17	MID-M	VRF	IDM	0.161784	0.159906
P17	MID-M	Normal	Lacunarity	1.13036	1.12866
P17	MID-M	VRF	Lacunarity	1.1421	1.13526
P17	MID-D	Normal	ASM	0.000716936	0.000715794
P17	MID-D	VRF	ASM	0.000513902	0.000554618
P17	MID-D	Normal	Contrast	436.024	307.907
P17	MID-D	VRF	Contrast	484.485	496.322
P17	MID-D	Normal	Entropy	12.702	12.7302
P17	MID-D	VRF	Entropy	13.1263	13.0409
P17	MID-D	Normal	FD	1.09846	1.08132
P17	MID-D	VRF	FD	1.07512	1.02517
P17	MID-D	Normal	IDM	0.144724	0.169188
P17	MID-D	VRF	IDM	0.162697	0.157921
P17	MID-D	Normal	Lacunarity	1.16053	1.1604
P17	MID-D	VRF	Lacunarity	1.1691	1.16858
P17	PERI-M	Normal	ASM	0.00070397	0.000702809
P17	PERI-M	VRF	ASM	0.000490256	0.00053166
P17	PERI-M	Normal	Contrast	406.136	282.067
P17	PERI-M	VRF	Contrast	424.387	435.415
P17	PERI-M	Normal	Entropy	12.7654	12.7946
P17	PERI-M	VRF	Entropy	13.2443	13.1453
P17	PERI-M	Normal	FD	1.1393	1.13583
P17	PERI-M	VRF	FD	1.1243	1.0691
P17	PERI-M	Normal	IDM	0.148297	0.171013
P17	PERI-M	VRF	IDM	0.166556	0.16002
P17	PERI-M	Normal	Lacunarity	1.15027	1.14958
P17	PERI-M	VRF	Lacunarity	1.15777	1.15622
P17	PERI-D	Normal	ASM	0.000637597	0.000618297
P17	PERI-D	VRF	ASM	0.000466712	0.00051096
P17	PERI-D	Normal	Contrast	411.438	274.775
P17	PERI-D	VRF	Contrast	390.785	398.93
P17	PERI-D	Normal	Entropy	12.9259	12.9839
P17	PERI-D	VRF	Entropy	13.3433	13.2353
P17	PERI-D	Normal	FD	1.16392	1.13549
P17	PERI-D	VRF	FD	1.14169	1.11
P17	PERI-D	Normal	IDM	0.14803	0.169724
P17	PERI-D	VRF	IDM	0.165264	0.159931
P17	PERI-D	Normal	Lacunarity	1.12041	1.12036
P17	PERI-D	VRF	Lacunarity	1.12843	1.12653
P18	AC-M	Normal	ASM	0.00131576	0.00131464
P18	AC-M	VRF	ASM	0.00141141	0.00136812
P18	AC-M	Normal	Contrast	824.132	901.615
P18	AC-M	VRF	Contrast	619.061	538.051
P18	AC-M	Normal	Entropy	11.6055	11.6066
P18	AC-M	VRF	Entropy	11.532	11.5639
P18	AC-M	Normal	FD	0.862503	0.779928
P18	AC-M	VRF	FD	1.03333	0.966578
P18	AC-M	Normal	IDM	0.100839	0.0937976
P18	AC-M	VRF	IDM	0.126238	0.117798
P18	AC-M	Normal	Lacunarity	1.30167	1.3025
P18	AC-M	VRF	Lacunarity	1.27224	1.29091
P18	AC-D	Normal	ASM	0.000689286	0.000697645
P18	AC-D	VRF	ASM	0.000795596	0.000746615
P18	AC-D	Normal	Contrast	624.325	662.118
P18	AC-D	VRF	Contrast	437.506	478.412
P18	AC-D	Normal	Entropy	12.5627	12.5509
P18	AC-D	VRF	Entropy	12.4048	12.4805
P18	AC-D	Normal	FD	0.99278	0.963209
P18	AC-D	VRF	FD	1.04435	1.07263
P18	AC-D	Normal	IDM	0.114932	0.114859
P18	AC-D	VRF	IDM	0.177674	0.150116
P18	AC-D	Normal	Lacunarity	1.18398	1.18317
P18	AC-D	VRF	Lacunarity	1.19973	1.21664
P18	APEX	Normal	ASM	0.000306374	0.000310411
P18	APEX	VRF	ASM	0.000321777	0.000302288
P18	APEX	Normal	Contrast	348.412	362.515
P18	APEX	VRF	Contrast	281.585	373.191
P18	APEX	Normal	Entropy	13.8826	13.8703
P18	APEX	VRF	Entropy	13.8254	13.9068
P18	APEX	Normal	FD	1.03395	1.06694
P18	APEX	VRF	FD	1.09803	1.14536
P18	APEX	Normal	IDM	0.151175	0.150501
P18	APEX	VRF	IDM	0.176539	0.158951
P18	APEX	Normal	Lacunarity	1.15957	1.15816
P18	APEX	VRF	Lacunarity	1.1753	1.15978
P18	MID-M	Normal	ASM	0.000493048	0.000500317
P18	MID-M	VRF	ASM	0.00055866	0.000538044
P18	MID-M	Normal	Contrast	614.795	577.924
P18	MID-M	VRF	Contrast	412.023	379.127
P18	MID-M	Normal	Entropy	13.0781	13.0591
P18	MID-M	VRF	Entropy	12.9378	12.9784
P18	MID-M	Normal	FD	1.05615	1.04546
P18	MID-M	VRF	FD	1.06966	1.13152
P18	MID-M	Normal	IDM	0.121745	0.125463
P18	MID-M	VRF	IDM	0.169579	0.162115
P18	MID-M	Normal	Lacunarity	1.13722	1.13536
P18	MID-M	VRF	Lacunarity	1.13273	1.13439
P18	MID-D	Normal	ASM	0.00039659	0.000408063
P18	MID-D	VRF	ASM	0.000473111	0.000448868
P18	MID-D	Normal	Contrast	539.544	510.784
P18	MID-D	VRF	Contrast	376.562	383.479
P18	MID-D	Normal	Entropy	13.4156	13.3868
P18	MID-D	VRF	Entropy	13.2223	13.2716
P18	MID-D	Normal	FD	1.02374	1.01244
P18	MID-D	VRF	FD	1.05467	1.1268
P18	MID-D	Normal	IDM	0.126317	0.132054
P18	MID-D	VRF	IDM	0.171592	0.163313
P18	MID-D	Normal	Lacunarity	1.17518	1.16963
P18	MID-D	VRF	Lacunarity	1.17122	1.17091
P18	PERI-M	Normal	ASM	0.000345085	0.000364795
P18	PERI-M	VRF	ASM	0.000390117	0.000380527
P18	PERI-M	Normal	Contrast	450.226	431.829
P18	PERI-M	VRF	Contrast	371.9	390.966
P18	PERI-M	Normal	Entropy	13.6452	13.591
P18	PERI-M	VRF	Entropy	13.5115	13.5355
P18	PERI-M	Normal	FD	1.02872	1.02774
P18	PERI-M	VRF	FD	1.09442	1.16529
P18	PERI-M	Normal	IDM	0.134873	0.141704
P18	PERI-M	VRF	IDM	0.166331	0.159041
P18	PERI-M	Normal	Lacunarity	1.16689	1.16272
P18	PERI-M	VRF	Lacunarity	1.15832	1.15358
P18	PERI-D	Normal	ASM	0.000321961	0.000341531
P18	PERI-D	VRF	ASM	0.000358611	0.000357304
P18	PERI-D	Normal	Contrast	426.879	396.605
P18	PERI-D	VRF	Contrast	277.97	383.476
P18	PERI-D	Normal	Entropy	13.7844	13.7244
P18	PERI-D	VRF	Entropy	13.6641	13.6694
P18	PERI-D	Normal	FD	1.06636	1.0955
P18	PERI-D	VRF	FD	1.11426	1.1799
P18	PERI-D	Normal	IDM	0.139871	0.144743
P18	PERI-D	VRF	IDM	0.179344	0.160697
P18	PERI-D	Normal	Lacunarity	1.12981	1.12938
P18	PERI-D	VRF	Lacunarity	1.14698	1.13037
P19	AC-M	Normal	ASM	0.00149436	0.00163724
P19	AC-M	VRF	ASM	0.00192926	0.00204613
P19	AC-M	Normal	Contrast	625.963	1048.34
P19	AC-M	VRF	Contrast	565.567	410.869
P19	AC-M	Normal	Entropy	11.4648	11.3713
P19	AC-M	VRF	Entropy	11.1939	11.1135
P19	AC-M	Normal	FD	0.93117	0.928592
P19	AC-M	VRF	FD	0.992634	0.896716
P19	AC-M	Normal	IDM	0.111615	0.102968
P19	AC-M	VRF	IDM	0.12857	0.14315
P19	AC-M	Normal	Lacunarity	1.29061	1.31138
P19	AC-M	VRF	Lacunarity	1.2977	1.28933
P19	AC-D	Normal	ASM	0.000949099	0.000982221
P19	AC-D	VRF	ASM	0.00104408	0.00105196
P19	AC-D	Normal	Contrast	579.673	811.133
P19	AC-D	VRF	Contrast	610.325	558.462
P19	AC-D	Normal	Entropy	12.2072	12.1698
P19	AC-D	VRF	Entropy	12.1034	12.0844
P19	AC-D	Normal	FD	1.06339	1.11919
P19	AC-D	VRF	FD	1.05791	0.955707
P19	AC-D	Normal	IDM	0.120077	0.112514
P19	AC-D	VRF	IDM	0.146799	0.159464
P19	AC-D	Normal	Lacunarity	1.16954	1.17585
P19	AC-D	VRF	Lacunarity	1.16863	1.17109
P19	APEX	Normal	ASM	0.000528809	0.000503183
P19	APEX	VRF	ASM	0.000622686	0.000842413
P19	APEX	Normal	Contrast	418.248	538.437
P19	APEX	VRF	Contrast	171.973	144.196
P19	APEX	Normal	Entropy	13.182	13.2504
P19	APEX	VRF	Entropy	13.1317	12.874
P19	APEX	Normal	FD	1.1422	1.12266
P19	APEX	VRF	FD	1.11551	1.12734
P19	APEX	Normal	IDM	0.140253	0.12996
P19	APEX	VRF	IDM	0.21973	0.223628
P19	APEX	Normal	Lacunarity	1.14419	1.14731
P19	APEX	VRF	Lacunarity	1.15571	1.15471
P19	MID-M	Normal	ASM	0.000795086	0.000764755
P19	MID-M	VRF	ASM	0.000728226	0.000704997
P19	MID-M	Normal	Contrast	544.475	869.323
P19	MID-M	VRF	Contrast	404.215	293.06
P19	MID-M	Normal	Entropy	12.5244	12.5776
P19	MID-M	VRF	Entropy	12.6345	12.6636
P19	MID-M	Normal	FD	1.18029	1.13095
P19	MID-M	VRF	FD	1.10084	1.08283
P19	MID-M	Normal	IDM	0.126511	0.115276
P19	MID-M	VRF	IDM	0.161702	0.182049
P19	MID-M	Normal	Lacunarity	1.1217	1.1249
P19	MID-M	VRF	Lacunarity	1.12169	1.12942
P19	MID-D	Normal	ASM	0.00064349	0.000628203
P19	MID-D	VRF	ASM	0.0006325	0.000614567
P19	MID-D	Normal	Contrast	441.9	581.468
P19	MID-D	VRF	Contrast	227.596	191.431
P19	MID-D	Normal	Entropy	12.8511	12.8782
P19	MID-D	VRF	Entropy	12.8829	12.9173
P19	MID-D	Normal	FD	1.11914	1.07571
P19	MID-D	VRF	FD	1.06857	1.06185
P19	MID-D	Normal	IDM	0.136834	0.128541
P19	MID-D	VRF	IDM	0.211483	0.211309
P19	MID-D	Normal	Lacunarity	1.15793	1.15679
P19	MID-D	VRF	Lacunarity	1.16464	1.16815
P19	PERI-M	Normal	ASM	0.000588637	0.000543273
P19	PERI-M	VRF	ASM	0.000573276	0.000669324
P19	PERI-M	Normal	Contrast	436.405	574.783
P19	PERI-M	VRF	Contrast	205.076	171.057
P19	PERI-M	Normal	Entropy	13.0026	13.0949
P19	PERI-M	VRF	Entropy	13.0953	12.9559
P19	PERI-M	Normal	FD	1.13692	1.08891
P19	PERI-M	VRF	FD	1.10829	1.10932
P19	PERI-M	Normal	IDM	0.137084	0.126724
P19	PERI-M	VRF	IDM	0.216366	0.21843
P19	PERI-M	Normal	Lacunarity	1.14674	1.14823
P19	PERI-M	VRF	Lacunarity	1.15737	1.15911
P19	PERI-D	Normal	ASM	0.000551847	0.000516785
P19	PERI-D	VRF	ASM	0.00057455	0.000714525
P19	PERI-D	Normal	Contrast	419.57	551.452
P19	PERI-D	VRF	Contrast	187.135	154.817
P19	PERI-D	Normal	Entropy	13.1111	13.1886
P19	PERI-D	VRF	Entropy	13.1516	12.9561
P19	PERI-D	Normal	FD	1.15963	1.1157
P19	PERI-D	VRF	FD	1.12993	1.13186
P19	PERI-D	Normal	IDM	0.139032	0.128486
P19	PERI-D	VRF	IDM	0.217464	0.221691
P19	PERI-D	Normal	Lacunarity	1.11748	1.11973
P19	PERI-D	VRF	Lacunarity	1.13041	1.12986
P20	AC-M	Normal	ASM	0.00149436	0.00163724
P20	AC-M	VRF	ASM	0.00158482	0.0015326
P20	AC-M	Normal	Contrast	625.963	1048.34
P20	AC-M	VRF	Contrast	820.345	1243.96
P20	AC-M	Normal	Entropy	11.4648	11.3713
P20	AC-M	VRF	Entropy	11.4031	11.4409
P20	AC-M	Normal	FD	0.93117	0.928592
P20	AC-M	VRF	FD	0.922328	0.944478
P20	AC-M	Normal	IDM	0.111615	0.102968
P20	AC-M	VRF	IDM	0.105123	0.0930862
P20	AC-M	Normal	Lacunarity	1.29061	1.31138
P20	AC-M	VRF	Lacunarity	1.28567	1.29684
P20	AC-D	Normal	ASM	0.000949099	0.000982221
P20	AC-D	VRF	ASM	0.000827179	0.000813041
P20	AC-D	Normal	Contrast	579.673	811.133
P20	AC-D	VRF	Contrast	498.576	454.671
P20	AC-D	Normal	Entropy	12.2072	12.1698
P20	AC-D	VRF	Entropy	12.3642	12.3862
P20	AC-D	Normal	FD	1.06339	1.11919
P20	AC-D	VRF	FD	1.09409	1.00888
P20	AC-D	Normal	IDM	0.120077	0.112514
P20	AC-D	VRF	IDM	0.128572	0.132985
P20	AC-D	Normal	Lacunarity	1.16954	1.17585
P20	AC-D	VRF	Lacunarity	1.18042	1.18485
P20	APEX	Normal	ASM	0.000528809	0.000503183
P20	APEX	VRF	ASM	0.000444938	0.000444938
P20	APEX	Normal	Contrast	418.248	538.437
P20	APEX	VRF	Contrast	333.659	333.659
P20	APEX	Normal	Entropy	13.182	13.2504
P20	APEX	VRF	Entropy	13.4325	13.4325
P20	APEX	Normal	FD	1.1422	1.12266
P20	APEX	VRF	FD	1.13676	1.13676
P20	APEX	Normal	IDM	0.140253	0.12996
P20	APEX	VRF	IDM	0.152929	0.152929
P20	APEX	Normal	Lacunarity	1.14419	1.14731
P20	APEX	VRF	Lacunarity	1.15601	1.15601
P20	MID-M	Normal	ASM	0.000795086	0.000764755
P20	MID-M	VRF	ASM	0.000620728	0.000626064
P20	MID-M	Normal	Contrast	544.475	869.323
P20	MID-M	VRF	Contrast	460.488	425.252
P20	MID-M	Normal	Entropy	12.5244	12.5776
P20	MID-M	VRF	Entropy	12.8145	12.8141
P20	MID-M	Normal	FD	1.18029	1.13095
P20	MID-M	VRF	FD	1.11853	1.12349
P20	MID-M	Normal	IDM	0.126511	0.115276
P20	MID-M	VRF	IDM	0.131298	0.136436
P20	MID-M	Normal	Lacunarity	1.1217	1.1249
P20	MID-M	VRF	Lacunarity	1.13563	1.13967
P20	MID-D	Normal	ASM	0.00064349	0.000628203
P20	MID-D	VRF	ASM	0.000531213	0.000534045
P20	MID-D	Normal	Contrast	441.9	581.468
P20	MID-D	VRF	Contrast	481.347	371.365
P20	MID-D	Normal	Entropy	12.8511	12.8782
P20	MID-D	VRF	Entropy	13.0767	13.077
P20	MID-D	Normal	FD	1.11914	1.07571
P20	MID-D	VRF	FD	1.09789	1.10278
P20	MID-D	Normal	IDM	0.136834	0.128541
P20	MID-D	VRF	IDM	0.132907	0.14572
P20	MID-D	Normal	Lacunarity	1.15793	1.15679
P20	MID-D	VRF	Lacunarity	1.16664	1.17376
P20	PERI-M	Normal	ASM	0.000588637	0.000543273
P20	PERI-M	VRF	ASM	0.000489017	0.00050828
P20	PERI-M	Normal	Contrast	436.405	574.783
P20	PERI-M	VRF	Contrast	470.073	346.214
P20	PERI-M	Normal	Entropy	13.0026	13.0949
P20	PERI-M	VRF	Entropy	13.2344	13.2016
P20	PERI-M	Normal	FD	1.13692	1.08891
P20	PERI-M	VRF	FD	1.13596	1.11766
P20	PERI-M	Normal	IDM	0.137084	0.126724
P20	PERI-M	VRF	IDM	0.135391	0.150169
P20	PERI-M	Normal	Lacunarity	1.14674	1.14823
P20	PERI-M	VRF	Lacunarity	1.15598	1.16097
P20	PERI-D	Normal	ASM	0.000551847	0.000516785
P20	PERI-D	VRF	ASM	0.000433888	0.000461154
P20	PERI-D	Normal	Contrast	419.57	551.452
P20	PERI-D	VRF	Contrast	432.791	334.158
P20	PERI-D	Normal	Entropy	13.1111	13.1886
P20	PERI-D	VRF	Entropy	13.4155	13.3562
P20	PERI-D	Normal	FD	1.15963	1.1157
P20	PERI-D	VRF	FD	1.14305	1.1564
P20	PERI-D	Normal	IDM	0.139032	0.128486
P20	PERI-D	VRF	IDM	0.138438	0.151535
P20	PERI-D	Normal	Lacunarity	1.11748	1.11973
P20	PERI-D	VRF	Lacunarity	1.12815	1.13233
P21	AC-M	Normal	ASM	0.00143178	0.00146823
P21	AC-M	VRF	ASM	0.00169125	0.00171969
P21	AC-M	Normal	Contrast	526.498	686.075
P21	AC-M	VRF	Contrast	356.863	403.7
P21	AC-M	Normal	Entropy	11.5155	11.4927
P21	AC-M	VRF	Entropy	11.3418	11.3253
P21	AC-M	Normal	FD	0.954033	0.867375
P21	AC-M	VRF	FD	0.96649	0.953384
P21	AC-M	Normal	IDM	0.128247	0.115273
P21	AC-M	VRF	IDM	0.143982	0.140153
P21	AC-M	Normal	Lacunarity	1.27905	1.30334
P21	AC-M	VRF	Lacunarity	1.2953	1.29802
P21	AC-D	Normal	ASM	0.000805934	0.000827208
P21	AC-D	VRF	ASM	0.000904181	0.000907064
P21	AC-D	Normal	Contrast	435.11	543.38
P21	AC-D	VRF	Contrast	449.973	517.516
P21	AC-D	Normal	Entropy	12.3933	12.3663
P21	AC-D	VRF	Entropy	12.2649	12.2751
P21	AC-D	Normal	FD	1.08169	0.984327
P21	AC-D	VRF	FD	0.988036	1.02646
P21	AC-D	Normal	IDM	0.132505	0.133402
P21	AC-D	VRF	IDM	0.166058	0.175713
P21	AC-D	Normal	Lacunarity	1.17025	1.17366
P21	AC-D	VRF	Lacunarity	1.19308	1.20042
P21	APEX	Normal	ASM	0.000368902	0.000368849
P21	APEX	VRF	ASM	0.000465244	0.000442681
P21	APEX	Normal	Contrast	366.21	464.811
P21	APEX	VRF	Contrast	403.217	437.598
P21	APEX	Normal	Entropy	13.6478	13.6432
P21	APEX	VRF	Entropy	13.3968	13.4445
P21	APEX	Normal	FD	1.09493	1.07102
P21	APEX	VRF	FD	1.11724	1.09725
P21	APEX	Normal	IDM	0.1523	0.152801
P21	APEX	VRF	IDM	0.17739	0.183018
P21	APEX	Normal	Lacunarity	1.15161	1.14873
P21	APEX	VRF	Lacunarity	1.15005	1.15142
P21	MID-M	Normal	ASM	0.000608686	0.000614953
P21	MID-M	VRF	ASM	0.000620544	0.000622892
P21	MID-M	Normal	Contrast	478.288	586.365
P21	MID-M	VRF	Contrast	434.386	537.149
P21	MID-M	Normal	Entropy	12.8377	12.8279
P21	MID-M	VRF	Entropy	12.8187	12.8173
P21	MID-M	Normal	FD	1.12436	1.06286
P21	MID-M	VRF	FD	1.0875	1.06433
P21	MID-M	Normal	IDM	0.132512	0.13236
P21	MID-M	VRF	IDM	0.167677	0.172709
P21	MID-M	Normal	Lacunarity	1.12793	1.12688
P21	MID-M	VRF	Lacunarity	1.13602	1.13873
P21	MID-D	Normal	ASM	0.000499039	0.000499486
P21	MID-D	VRF	ASM	0.000522782	0.000520963
P21	MID-D	Normal	Contrast	381.145	480.901
P21	MID-D	VRF	Contrast	536.235	610.908
P21	MID-D	Normal	Entropy	13.1533	13.1503
P21	MID-D	VRF	Entropy	13.1008	13.1075
P21	MID-D	Normal	FD	1.07927	0.994607
P21	MID-D	VRF	FD	1.03798	1.06713
P21	MID-D	Normal	IDM	0.148854	0.15255
P21	MID-D	VRF	IDM	0.170046	0.175355
P21	MID-D	Normal	Lacunarity	1.16261	1.16168
P21	MID-D	VRF	Lacunarity	1.17022	1.17475
P21	PERI-M	Normal	ASM	0.000435408	0.000436023
P21	PERI-M	VRF	ASM	0.000461197	0.00045663
P21	PERI-M	Normal	Contrast	396.693	465.233
P21	PERI-M	VRF	Contrast	473.041	540.771
P21	PERI-M	Normal	Entropy	13.3729	13.3724
P21	PERI-M	VRF	Entropy	13.3016	13.3155
P21	PERI-M	Normal	FD	1.10357	1.04575
P21	PERI-M	VRF	FD	1.0846	1.10543
P21	PERI-M	Normal	IDM	0.147823	0.151698
P21	PERI-M	VRF	IDM	0.1727	0.177255
P21	PERI-M	Normal	Lacunarity	1.15297	1.15309
P21	PERI-M	VRF	Lacunarity	1.15309	1.15562
P21	PERI-D	Normal	ASM	0.000405018	0.000396766
P21	PERI-D	VRF	ASM	0.000457369	0.000427041
P21	PERI-D	Normal	Contrast	382.456	479.935
P21	PERI-D	VRF	Contrast	445.135	491.569
P21	PERI-D	Normal	Entropy	13.5035	13.5265
P21	PERI-D	VRF	Entropy	13.3696	13.4326
P21	PERI-D	Normal	FD	1.1072	1.06963
P21	PERI-D	VRF	FD	1.10616	1.09921
P21	PERI-D	Normal	IDM	0.151315	0.152631
P21	PERI-D	VRF	IDM	0.175485	0.178834
P21	PERI-D	Normal	Lacunarity	1.12404	1.12296
P21	PERI-D	VRF	Lacunarity	1.12585	1.12744
P22	AC-M	Normal	ASM	0.00140287	0.00141388
P22	AC-M	VRF	ASM	0.00151143	0.00142275
P22	AC-M	Normal	Contrast	774.141	873.604
P22	AC-M	VRF	Contrast	475.534	370.764
P22	AC-M	Normal	Entropy	11.5382	11.5293
P22	AC-M	VRF	Entropy	11.4641	11.5182
P22	AC-M	Normal	FD	0.944044	1.08036
P22	AC-M	VRF	FD	0.981181	0.946913
P22	AC-M	Normal	IDM	0.104655	0.0961512
P22	AC-M	VRF	IDM	0.124288	0.127093
P22	AC-M	Normal	Lacunarity	1.29165	1.29315
P22	AC-M	VRF	Lacunarity	1.28523	1.29235
P22	AC-D	Normal	ASM	0.000835772	0.000784458
P22	AC-D	VRF	ASM	0.00091642	0.000815176
P22	AC-D	Normal	Contrast	457.793	478.988
P22	AC-D	VRF	Contrast	319.973	180.428
P22	AC-D	Normal	Entropy	12.359	12.4232
P22	AC-D	VRF	Entropy	12.277	12.3806
P22	AC-D	Normal	FD	1.01733	1.01484
P22	AC-D	VRF	FD	1.03912	1.01178
P22	AC-D	Normal	IDM	0.177897	0.175883
P22	AC-D	VRF	IDM	0.169329	0.171763
P22	AC-D	Normal	Lacunarity	1.18438	1.18855
P22	AC-D	VRF	Lacunarity	1.16568	1.16268
P22	APEX	Normal	ASM	0.000388758	0.000357516
P22	APEX	VRF	ASM	0.000439361	0.00049132
P22	APEX	Normal	Contrast	612.161	578.043
P22	APEX	VRF	Contrast	136.629	115.682
P22	APEX	Normal	Entropy	13.6086	13.6967
P22	APEX	VRF	Entropy	13.485	13.3645
P22	APEX	Normal	FD	1.0129	1.02373
P22	APEX	VRF	FD	1.0951	1.11203
P22	APEX	Normal	IDM	0.215603	0.208408
P22	APEX	VRF	IDM	0.216644	0.227593
P22	APEX	Normal	Lacunarity	1.17972	1.17384
P22	APEX	VRF	Lacunarity	1.14314	1.14302
P22	MID-M	Normal	ASM	0.000653071	0.000623825
P22	MID-M	VRF	ASM	0.000668323	0.000721733
P22	MID-M	Normal	Contrast	564.706	531.916
P22	MID-M	VRF	Contrast	294.248	155.112
P22	MID-M	Normal	Entropy	12.765	12.8161
P22	MID-M	VRF	Entropy	12.7646	12.7011
P22	MID-M	Normal	FD	1.05647	0.99249
P22	MID-M	VRF	FD	1.08082	1.09676
P22	MID-M	Normal	IDM	0.190057	0.190707
P22	MID-M	VRF	IDM	0.170057	0.185387
P22	MID-M	Normal	Lacunarity	1.15316	1.16191
P22	MID-M	VRF	Lacunarity	1.1206	1.12271
P22	MID-D	Normal	ASM	0.000564131	0.000535401
P22	MID-D	VRF	ASM	0.000544888	0.000666222
P22	MID-D	Normal	Contrast	570.461	572.099
P22	MID-D	VRF	Contrast	284.493	138.216
P22	MID-D	Normal	Entropy	13.02	13.0764
P22	MID-D	VRF	Entropy	13.0861	12.8837
P22	MID-D	Normal	FD	0.988076	0.919729
P22	MID-D	VRF	FD	1.05271	1.09802
P22	MID-D	Normal	IDM	0.204231	0.198903
P22	MID-D	VRF	IDM	0.172286	0.196281
P22	MID-D	Normal	Lacunarity	1.18225	1.18618
P22	MID-D	VRF	Lacunarity	1.15233	1.15316
P22	PERI-M	Normal	ASM	0.000495615	0.000490233
P22	PERI-M	VRF	ASM	0.000482211	0.00060118
P22	PERI-M	Normal	Contrast	610.586	664.281
P22	PERI-M	VRF	Contrast	250.206	130.596
P22	PERI-M	Normal	Entropy	13.2323	13.2495
P22	PERI-M	VRF	Entropy	13.2832	13.0496
P22	PERI-M	Normal	FD	1.02192	0.83905
P22	PERI-M	VRF	FD	1.0677	1.11568
P22	PERI-M	Normal	IDM	0.213921	0.205986
P22	PERI-M	VRF	IDM	0.179834	0.204855
P22	PERI-M	Normal	Lacunarity	1.19386	1.1949
P22	PERI-M	VRF	Lacunarity	1.14227	1.1426
P22	PERI-D	Normal	ASM	0.00042757	0.000401019
P22	PERI-D	VRF	ASM	0.000456488	0.000537932
P22	PERI-D	Normal	Contrast	690.611	658.251
P22	PERI-D	VRF	Contrast	178.788	120.789
P22	PERI-D	Normal	Entropy	13.4598	13.5326
P22	PERI-D	VRF	Entropy	13.4002	13.2405
P22	PERI-D	Normal	FD	0.999845	1.01309
P22	PERI-D	VRF	FD	1.0886	1.13295
P22	PERI-D	Normal	IDM	0.213642	0.207379
P22	PERI-D	VRF	IDM	0.201103	0.22168
P22	PERI-D	Normal	Lacunarity	1.15035	1.14918
P22	PERI-D	VRF	Lacunarity	1.11669	1.1171
P23	AC-M	Normal	ASM	0.0017405	0.0018766
P23	AC-M	VRF	ASM	0.00166105	0.00193559
P23	AC-M	Normal	Contrast	743.626	793.51
P23	AC-M	VRF	Contrast	652.855	907.841
P23	AC-M	Normal	Entropy	11.3038	11.2139
P23	AC-M	VRF	Entropy	11.349	11.1753
P23	AC-M	Normal	FD	1.01165	1.06531
P23	AC-M	VRF	FD	1.00448	1.07408
P23	AC-M	Normal	IDM	0.116709	0.11519
P23	AC-M	VRF	IDM	0.109042	0.100456
P23	AC-M	Normal	Lacunarity	1.30556	1.28091
P23	AC-M	VRF	Lacunarity	1.28491	1.29682
P23	AC-D	Normal	ASM	0.00114195	0.00115347
P23	AC-D	VRF	ASM	0.000975033	0.00102808
P23	AC-D	Normal	Contrast	693.592	782.79
P23	AC-D	VRF	Contrast	569.357	1020.84
P23	AC-D	Normal	Entropy	12.0026	11.9738
P23	AC-D	VRF	Entropy	12.1643	12.1042
P23	AC-D	Normal	FD	1.09281	1.1238
P23	AC-D	VRF	FD	1.0311	1.09395
P23	AC-D	Normal	IDM	0.12335	0.117033
P23	AC-D	VRF	IDM	0.122457	0.104408
P23	AC-D	Normal	Lacunarity	1.17527	1.17138
P23	AC-D	VRF	Lacunarity	1.16085	1.16923
P23	APEX	Normal	ASM	0.000449205	0.000460437
P23	APEX	VRF	ASM	0.000430645	0.000421089
P23	APEX	Normal	Contrast	247.449	228.777
P23	APEX	VRF	Contrast	237.5	241.468
P23	APEX	Normal	Entropy	13.4311	13.3664
P23	APEX	VRF	Entropy	13.4584	13.4771
P23	APEX	Normal	FD	1.08526	1.12454
P23	APEX	VRF	FD	1.10872	1.14906
P23	APEX	Normal	IDM	0.176315	0.172025
P23	APEX	VRF	IDM	0.17414	0.170928
P23	APEX	Normal	Lacunarity	1.17579	1.16092
P23	APEX	VRF	Lacunarity	1.15867	1.16002
P23	MID-M	Normal	ASM	0.0007904	0.000795223
P23	MID-M	VRF	ASM	0.000686117	0.000713986
P23	MID-M	Normal	Contrast	508.025	558.165
P23	MID-M	VRF	Contrast	403.238	541.784
P23	MID-M	Normal	Entropy	12.5384	12.5223
P23	MID-M	VRF	Entropy	12.6857	12.644
P23	MID-M	Normal	FD	1.12369	1.17086
P23	MID-M	VRF	FD	1.11977	1.19775
P23	MID-M	Normal	IDM	0.138403	0.133235
P23	MID-M	VRF	IDM	0.141136	0.131738
P23	MID-M	Normal	Lacunarity	1.13364	1.12684
P23	MID-M	VRF	Lacunarity	1.12256	1.12611
P23	MID-D	Normal	ASM	0.000677476	0.000696935
P23	MID-D	VRF	ASM	0.000520323	0.00057142
P23	MID-D	Normal	Contrast	535.203	539.471
P23	MID-D	VRF	Contrast	239.542	253.484
P23	MID-D	Normal	Entropy	12.783	12.7394
P23	MID-D	VRF	Entropy	13.0907	12.9878
P23	MID-D	Normal	FD	1.08845	1.138
P23	MID-D	VRF	FD	1.05851	1.18555
P23	MID-D	Normal	IDM	0.137624	0.135084
P23	MID-D	VRF	IDM	0.169215	0.167179
P23	MID-D	Normal	Lacunarity	1.1676	1.16232
P23	MID-D	VRF	Lacunarity	1.16456	1.15676
P23	PERI-M	Normal	ASM	0.000596668	0.000609476
P23	PERI-M	VRF	ASM	0.000481344	0.000490394
P23	PERI-M	Normal	Contrast	504.996	515.676
P23	PERI-M	VRF	Contrast	246.311	256.672
P23	PERI-M	Normal	Entropy	12.9725	12.9415
P23	PERI-M	VRF	Entropy	13.2469	13.2182
P23	PERI-M	Normal	FD	1.1048	1.15393
P23	PERI-M	VRF	FD	1.10613	1.16569
P23	PERI-M	Normal	IDM	0.138904	0.136439
P23	PERI-M	VRF	IDM	0.171712	0.168525
P23	PERI-M	Normal	Lacunarity	1.15828	1.15387
P23	PERI-M	VRF	Lacunarity	1.15803	1.15076
P23	PERI-D	Normal	ASM	0.000543831	0.00055503
P23	PERI-D	VRF	ASM	0.000439798	0.000429322
P23	PERI-D	Normal	Contrast	439.843	518.673
P23	PERI-D	VRF	Contrast	246.933	253.283
P23	PERI-D	Normal	Entropy	13.122	13.0879
P23	PERI-D	VRF	Entropy	13.3942	13.4167
P23	PERI-D	Normal	FD	1.12286	1.16857
P23	PERI-D	VRF	FD	1.1198	1.16915
P23	PERI-D	Normal	IDM	0.144028	0.13645
P23	PERI-D	VRF	IDM	0.171472	0.170588
P23	PERI-D	Normal	Lacunarity	1.12927	1.12556
P23	PERI-D	VRF	Lacunarity	1.13024	1.13492
P24	AC-M	Normal	ASM	0.00135171	0.00130556
P24	AC-M	VRF	ASM	0.00155637	0.00139623
P24	AC-M	Normal	Contrast	588.715	650.41
P24	AC-M	VRF	Contrast	245.711	497.045
P24	AC-M	Normal	Entropy	11.5777	11.6122
P24	AC-M	VRF	Entropy	11.4327	11.5401
P24	AC-M	Normal	FD	0.849094	0.785442
P24	AC-M	VRF	FD	1.05273	0.939279
P24	AC-M	Normal	IDM	0.111677	0.105717
P24	AC-M	VRF	IDM	0.182744	0.130137
P24	AC-M	Normal	Lacunarity	1.317	1.29634
P24	AC-M	VRF	Lacunarity	1.27028	1.31118
P24	AC-D	Normal	ASM	0.000797442	0.000771398
P24	AC-D	VRF	ASM	0.000820351	0.000725544
P24	AC-D	Normal	Contrast	254.777	387.047
P24	AC-D	VRF	Contrast	804.261	481.948
P24	AC-D	Normal	Entropy	12.4113	12.4478
P24	AC-D	VRF	Entropy	12.3855	12.5117
P24	AC-D	Normal	FD	0.822359	0.905176
P24	AC-D	VRF	FD	0.786992	1.06546
P24	AC-D	Normal	IDM	0.182608	0.181339
P24	AC-D	VRF	IDM	0.194718	0.137863
P24	AC-D	Normal	Lacunarity	1.16194	1.17366
P24	AC-D	VRF	Lacunarity	1.18338	1.17043
P24	APEX	Normal	ASM	0.000354064	0.000326451
P24	APEX	VRF	ASM	0.000539542	0.000323273
P24	APEX	Normal	Contrast	367.295	435.749
P24	APEX	VRF	Contrast	309.928	357.55
P24	APEX	Normal	Entropy	13.7049	13.8066
P24	APEX	VRF	Entropy	13.2421	13.8171
P24	APEX	Normal	FD	0.914097	0.976888
P24	APEX	VRF	FD	0.920413	1.04674
P24	APEX	Normal	IDM	0.200679	0.185696
P24	APEX	VRF	IDM	0.218068	0.154139
P24	APEX	Normal	Lacunarity	1.15209	1.15136
P24	APEX	VRF	Lacunarity	1.15504	1.14445
P24	MID-M	Normal	ASM	0.000614833	0.000578639
P24	MID-M	VRF	ASM	0.000710282	0.00056298
P24	MID-M	Normal	Contrast	380.55	470.989
P24	MID-M	VRF	Contrast	572.757	453.632
P24	MID-M	Normal	Entropy	12.8436	12.9038
P24	MID-M	VRF	Entropy	12.6975	12.9357
P24	MID-M	Normal	FD	0.885842	0.845843
P24	MID-M	VRF	FD	0.965708	1.10569
P24	MID-M	Normal	IDM	0.202667	0.18984
P24	MID-M	VRF	IDM	0.206965	0.150883
P24	MID-M	Normal	Lacunarity	1.13378	1.13818
P24	MID-M	VRF	Lacunarity	1.13857	1.12443
P24	MID-D	Normal	ASM	0.000474098	0.000440652
P24	MID-D	VRF	ASM	0.000583826	0.000443771
P24	MID-D	Normal	Contrast	490.637	617.13
P24	MID-D	VRF	Contrast	470.834	432.881
P24	MID-D	Normal	Entropy	13.2239	13.3004
P24	MID-D	VRF	Entropy	13.0016	13.2944
P24	MID-D	Normal	FD	0.896564	0.993691
P24	MID-D	VRF	FD	0.954512	1.05434
P24	MID-D	Normal	IDM	0.200751	0.185231
P24	MID-D	VRF	IDM	0.208568	0.147205
P24	MID-D	Normal	Lacunarity	1.16343	1.16787
P24	MID-D	VRF	Lacunarity	1.1745	1.15694
P24	PERI-M	Normal	ASM	0.000409561	0.000374929
P24	PERI-M	VRF	ASM	0.000546259	0.000386386
P24	PERI-M	Normal	Contrast	441.273	542.064
P24	PERI-M	VRF	Contrast	401.669	401.562
P24	PERI-M	Normal	Entropy	13.4529	13.5477
P24	PERI-M	VRF	Entropy	13.1439	13.525
P24	PERI-M	Normal	FD	0.885573	0.967728
[truncated: 1,361 more rows]
