# Supplementary material
Source: Research Square preprint supplement (doi:10.21203/rs.3.rs-9174810/v1)
Supplement: Supplementary file 1 [file 9713a1a3dc994701aaa5e8f5.docx]

Table S2. Inter-observer reliability of texture features across ROIs assessed by intraclass correlation coefficients

| **ROI** | **Feature** | **ICC(2,1) Normal (95% CI)** | **ICC(2,1) VRF (95% CI)** | **ICC(2,k) Normal (95% CI)** | **ICC(2,k) VRF (95% CI)** | **CV Normal (%)** | **CV VRF (%)** | **n** |
| --- | --- | --- | --- | --- | --- | --- | --- | --- |
| AC-D | ASM | 0.93 (0.87-0.96) | 0.84 (0.72-0.91) | 0.96 (0.93-0.98) | 0.91 (0.84-0.95) | 16.35142691 | 11.21279355 | 40 |
| AC-D | Contrast | 0.73 (0.55-0.85) | 0.63 (0.39-0.78) | 0.85 (0.71-0.92) | 0.77 (0.57-0.88) | 28.88426117 | 32.11422598 | 40 |
| AC-D | Entropy | 0.94 (0.89-0.97) | 0.87 (0.77-0.93) | 0.97 (0.94-0.98) | 0.93 (0.87-0.96) | 1.477530128 | 0.985974735 | 40 |
| AC-D | FD | 0.61 (0.37-0.77) | 0.17 (-0.15-0.45) | 0.76 (0.54-0.87) | 0.29 (-0.34-0.62) | 6.177099521 | 5.530753292 | 40 |
| AC-D | IDM | 0.88 (0.79-0.94) | 0.80 (0.65-0.89) | 0.94 (0.88-0.97) | 0.89 (0.79-0.94) | 17.34382875 | 15.62440055 | 40 |
| AC-D | Lacunarity | 0.80 (0.65-0.89) | 0.59 (0.35-0.76) | 0.89 (0.78-0.94) | 0.75 (0.52-0.87) | 0.67907947 | 1.230553464 | 40 |
| AC-M | ASM | 0.92 (0.86-0.96) | 0.84 (0.72-0.91) | 0.96 (0.92-0.98) | 0.92 (0.84-0.96) | 13.22738303 | 10.92429916 | 40 |
| AC-M | Contrast | 0.58 (0.34-0.76) | 0.60 (0.36-0.77) | 0.74 (0.50-0.86) | 0.75 (0.53-0.87) | 26.09633438 | 33.32038034 | 40 |
| AC-M | Entropy | 0.92 (0.85-0.96) | 0.85 (0.73-0.92) | 0.96 (0.92-0.98) | 0.92 (0.84-0.96) | 1.238255204 | 0.995589714 | 40 |
| AC-M | FD | 0.56 (0.31-0.74) | 0.50 (0.22-0.70) | 0.72 (0.47-0.85) | 0.66 (0.36-0.82) | 8.084016461 | 6.824332427 | 40 |
| AC-M | IDM | 0.57 (0.32-0.75) | 0.62 (0.38-0.78) | 0.73 (0.49-0.86) | 0.76 (0.55-0.87) | 9.606184817 | 12.23052764 | 40 |
| AC-M | Lacunarity | 0.54 (0.28-0.73) | 0.77 (0.60-0.87) | 0.70 (0.44-0.84) | 0.87 (0.75-0.93) | 1.043970004 | 1.347035121 | 40 |
| APEX | ASM | 0.96 (0.92-0.98) | 0.85 (0.73-0.92) | 0.98 (0.96-0.99) | 0.92 (0.84-0.96) | 17.97940723 | 23.83506181 | 40 |
| APEX | Contrast | 0.70 (0.50-0.83) | 0.67 (0.45-0.81) | 0.82 (0.66-0.91) | 0.80 (0.62-0.89) | 23.54363859 | 31.04012114 | 40 |
| APEX | Entropy | 0.89 (0.81-0.94) | 0.87 (0.76-0.93) | 0.94 (0.89-0.97) | 0.93 (0.86-0.96) | 1.796454422 | 1.789137563 | 40 |
| APEX | FD | 0.78 (0.63-0.88) | 0.64 (0.41-0.79) | 0.88 (0.77-0.94) | 0.78 (0.58-0.88) | 4.805587024 | 3.749092663 | 40 |
| APEX | IDM | 0.92 (0.86-0.96) | 0.86 (0.75-0.92) | 0.96 (0.92-0.98) | 0.93 (0.86-0.96) | 15.59068549 | 15.19643811 | 40 |
| APEX | Lacunarity | 0.89 (0.80-0.94) | 0.90 (0.81-0.94) | 0.94 (0.89-0.97) | 0.95 (0.90-0.97) | 0.625428182 | 0.77849705 | 40 |
| MID-D | ASM | 0.95 (0.90-0.97) | 0.86 (0.74-0.92) | 0.97 (0.95-0.99) | 0.92 (0.85-0.96) | 19.69152352 | 15.36984113 | 40 |
| MID-D | Contrast | 0.54 (0.28-0.73) | 0.64 (0.41-0.79) | 0.70 (0.44-0.84) | 0.78 (0.59-0.88) | 21.56633682 | 31.33583384 | 40 |
| MID-D | Entropy | 0.96 (0.92-0.98) | 0.58 (0.33-0.75) | 0.98 (0.96-0.99) | 0.73 (0.49-0.86) | 1.795492122 | 1.339033961 | 40 |
| MID-D | FD | 0.74 (0.56-0.85) | 0.54 (0.28-0.73) | 0.85 (0.72-0.92) | 0.70 (0.43-0.84) | 5.221968797 | 4.180528112 | 40 |
| MID-D | IDM | 0.91 (0.83-0.95) | 0.79 (0.63-0.88) | 0.95 (0.91-0.97) | 0.88 (0.78-0.94) | 16.9544182 | 14.0791108 | 40 |
| MID-D | Lacunarity | 0.90 (0.82-0.95) | 0.75 (0.57-0.86) | 0.95 (0.90-0.97) | 0.85 (0.72-0.92) | 0.641556165 | 0.738482228 | 40 |
| MID-M | ASM | 0.95 (0.91-0.97) | 0.84 (0.71-0.91) | 0.97 (0.95-0.99) | 0.91 (0.83-0.95) | 18.14825135 | 12.95813859 | 40 |
| MID-M | Contrast | 0.53 (0.27-0.72) | 0.56 (0.31-0.74) | 0.70 (0.43-0.84) | 0.72 (0.47-0.85) | 22.9696892 | 27.93764108 | 40 |
| MID-M | Entropy | 0.93 (0.87-0.96) | 0.85 (0.74-0.92) | 0.96 (0.93-0.98) | 0.92 (0.85-0.96) | 1.666243622 | 1.089037606 | 40 |
| MID-M | FD | 0.77 (0.61-0.87) | 0.42 (0.12-0.64) | 0.87 (0.76-0.93) | 0.59 (0.22-0.78) | 6.222232631 | 4.884778308 | 40 |
| MID-M | IDM | 0.88 (0.79-0.94) | 0.76 (0.60-0.87) | 0.94 (0.88-0.97) | 0.87 (0.75-0.93) | 17.11558238 | 13.90798735 | 40 |
| MID-M | Lacunarity | 0.91 (0.84-0.95) | 0.71 (0.51-0.83) | 0.95 (0.91-0.98) | 0.83 (0.67-0.91) | 0.967788967 | 0.875051381 | 40 |
| PERI-D | ASM | 0.96 (0.93-0.98) | 0.86 (0.76-0.92) | 0.98 (0.96-0.99) | 0.93 (0.86-0.96) | 18.93459399 | 21.01117608 | 40 |
| PERI-D | Contrast | 0.71 (0.52-0.84) | 0.64 (0.42-0.79) | 0.83 (0.68-0.91) | 0.78 (0.59-0.89) | 23.0577194 | 30.6549976 | 40 |
| PERI-D | Entropy | 0.96 (0.92-0.98) | 0.88 (0.78-0.93) | 0.98 (0.96-0.99) | 0.93 (0.87-0.96) | 1.794725565 | 1.611669165 | 40 |
| PERI-D | FD | 0.67 (0.46-0.81) | 0.68 (0.47-0.82) | 0.80 (0.63-0.90) | 0.81 (0.64-0.90) | 5.375928122 | 4.062573987 | 40 |
| PERI-D | IDM | 0.93 (0.88-0.96) | 0.86 (0.74-0.92) | 0.97 (0.93-0.98) | 0.92 (0.85-0.96) | 16.66948375 | 14.88167911 | 40 |
| PERI-D | Lacunarity | 0.94 (0.89-0.97) | 0.89 (0.80-0.94) | 0.97 (0.94-0.98) | 0.94 (0.89-0.97) | 0.650828655 | 0.816371184 | 40 |
| PERI-M | ASM | 0.95 (0.90-0.97) | 0.87 (0.77-0.93) | 0.97 (0.95-0.99) | 0.93 (0.87-0.96) | 19.00688794 | 18.39554846 | 40 |
| PERI-M | Contrast | 0.68 (0.48-0.82) | 0.69 (0.48-0.82) | 0.81 (0.64-0.90) | 0.81 (0.65-0.90) | 21.74477319 | 29.79298886 | 40 |
| PERI-M | Entropy | 0.94 (0.90-0.97) | 0.87 (0.77-0.93) | 0.97 (0.95-0.99) | 0.93 (0.87-0.96) | 1.770420002 | 1.443005294 | 40 |
| PERI-M | FD | 0.67 (0.46-0.81) | 0.64 (0.42-0.79) | 0.81 (0.63-0.90) | 0.78 (0.59-0.89) | 5.890069934 | 4.294612074 | 40 |
| PERI-M | IDM | 0.93 (0.86-0.96) | 0.84 (0.72-0.91) | 0.96 (0.93-0.98) | 0.91 (0.84-0.95) | 16.39894689 | 14.34218942 | 40 |
| PERI-M | Lacunarity | 0.96 (0.93-0.98) | 0.88 (0.78-0.93) | 0.98 (0.96-0.99) | 0.93 (0.88-0.97) | 0.988818912 | 0.738254232 | 40 |

Abbreviations: ICC, Intraclass correlation coefficients; CV, Coefficient of variance.-
